# Supplementary material for: Apis mellifera Solinvivirus-1, a Novel Honey Bee Virus That Remained Undetected for over a Decade, Is Widespread in the USA
Source: MDPI journal article supplement (doi:10.3390/v15071597), 2023-07-21

**Supplementary Figure S2.** Binomial modeling results AmSV1 prevalence across US climate zones (based on [https://www.researchgate.net/figure/US-climate-regionsidentified-by-the-National-Climate-Data-Center-adapted-from-Karl-and\\_fig1\\_306023638](https://www.researchgate.net/figure/US-climate-regionsidentified-by-the-National-Climate-Data-Center-adapted-from-Karl-and_fig1_306023638) )

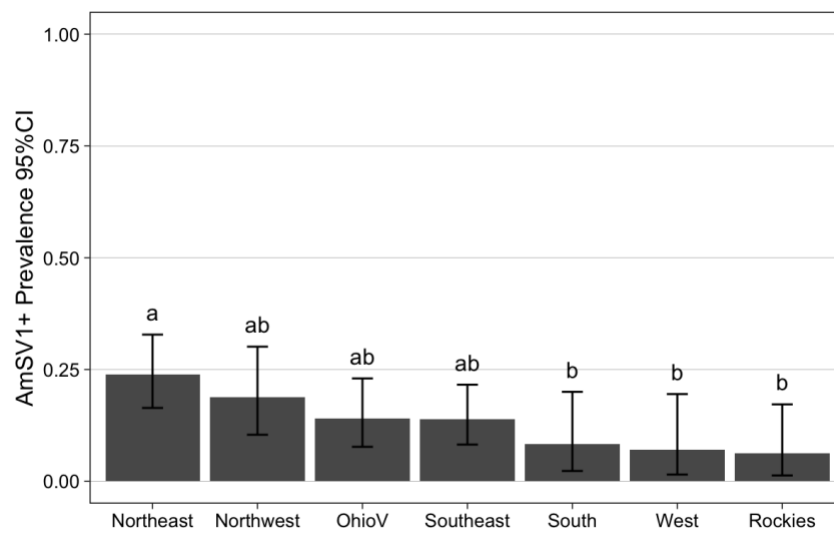

Supplement: s1 [file s1]
