# Supplementary material for: Apis mellifera Solinvivirus-1, a Novel Honey Bee Virus That Remained Undetected for over a Decade, Is Widespread in the USA
Source: MDPI journal article supplement (doi:10.3390/v15071597), 2023-07-21
Supplement: s1 [file s1]

**Supplementary Figure S1.** Alignment of the complete polyprotein sequences of *Apis mellifera* solinivirus-1 (AmSV1) and classified and putative soliniviruses. GenBank accession numbers are shown, for Rosy apple aphid virus and Solenopsis invicta virus-3, the putative ORF1-ORF2 fusion products were used.

|          |                                            |                                                                 |     |
|----------|--------------------------------------------|-----------------------------------------------------------------|-----|
| DQ286292 | Rosy apple aphid virus                     | -----                                                           | 0   |
| OP265432 | Penaeus vannamei solinivirus               | -----MQSEEL-----                                                | 6   |
| MZ210029 | Fushun monoleptalauta Solinvi-like virus 1 | -----                                                           | 24  |
| KX024775 | Nylanderia fulva virus 1                   | -----MTSEKVMRIRGERA-----GTPKIGDIME                              | 24  |
| KY070327 | Diabrotica virgifera virgifera virus 2     | -----MFNPCKLT--PKVNITSVMQTPKVATPKVATPKVNEIDPTIN-KITAILMI        | 52  |
| OQ540582 | Apis mellifera solinivirus-1               | MSYIDMNAEKQTNAEKHTNAERHMAEKQQNA-----EKHTNAEKHMAEKHKQTKNAEMH     | 56  |
| MN918666 | Picornavirales [unknown host]              | -----                                                           | 0   |
| MW251313 | Icha Creek insect virus                    | -----                                                           | 0   |
| MZ822083 | Apis picorna-like virus-4                  | -----                                                           | 0   |
| FJ528584 | Solenopsis invicta virus-3                 | -----                                                           | 0   |
| MW314636 | Myrmica rubra picorna-like virus           | -----                                                           | 0   |
| OL569508 | Corparats virus-2                          | MPYVRDLEDYE-----FWEVEPE-----PISFEVE                             | 25  |
| DQ286292 | Rosy apple aphid virus                     | -----                                                           | 0   |
| OP265432 | Penaeus vannamei solinivirus               | -----YKLSHCVKKSCISFALYKRHSC-----                                | 28  |
| MZ210029 | Fushun monoleptalauta Solinvi-like virus 1 | -----MRDCLKRFY-STFIGIYSALVGTSKQQNSTSNGIENSTSIGNYNS              | 44  |
| KX024775 | Nylanderia fulva virus 1                   | LNS-----FETI-----F-----                                         | 32  |
| KY070327 | Diabrotica virgifera virgifera virus 2     | MQIGTILLFKTTNSIFSCLOQTY-SKFSL-Y-----                            | 82  |
| OQ540582 | Apis mellifera solinivirus-1               | MKAGKHCVSKHILSRARVLQARKY-KRKEL-NLPWNE-----                      | 91  |
| MN918666 | Picornavirales [unknown host]              | -----                                                           | 0   |
| MW251313 | Icha Creek insect virus                    | -----                                                           | 0   |
| MZ822083 | Apis picorna-like virus-4                  | -----                                                           | 0   |
| FJ528584 | Solenopsis invicta virus-3                 | -----                                                           | 0   |
| MW314636 | Myrmica rubra picorna-like virus           | -----                                                           | 0   |
| OL569508 | Corparats virus-2                          | VVHNTMPYFKHLQHTVKEWKGWTR-EEASFFISEWID-----                      | 61  |
| DQ286292 | Rosy apple aphid virus                     | -----                                                           | 0   |
| OP265432 | Penaeus vannamei solinivirus               | -----TRMTPHPSNLKPLPDLDALA-----DANIQEATLEY-----FEEDFLCLQHIPS     | 72  |
| MZ210029 | Fushun monoleptalauta Solinvi-like virus 1 | TSNGTFVHRRPKHIFNGSGIHTRLMMYTFIMTMAMKRTMKYRQIPSSIGLFDHRTIPIS     | 104 |
| KX024775 | Nylanderia fulva virus 1                   | -----VMVPLVVAHVRSFVTRMFS-----TQFTVGGVRQ--KS                     | 63  |
| KY070327 | Diabrotica virgifera virgifera virus 2     | -----IR-----SELAIFGTFITLCV                                      | 96  |
| OQ540582 | Apis mellifera solinivirus-1               | -----IR-----DKITPDAFIFILGCS                                     | 107 |
| MN918666 | Picornavirales [unknown host]              | -----                                                           | 0   |
| MW251313 | Icha Creek insect virus                    | -----MCLMI-----PQLTFVFCFV-----                                  | 15  |
| MZ822083 | Apis picorna-like virus-4                  | -----                                                           | 0   |
| FJ528584 | Solenopsis invicta virus-3                 | -----                                                           | 0   |
| MW314636 | Myrmica rubra picorna-like virus           | -----                                                           | 0   |
| OL569508 | Corparats virus-2                          | -----HPSFFNPKNYADFVEKSWM-----AQDFFFAFV-----                     | 90  |
| DQ286292 | Rosy apple aphid virus                     | -----                                                           | 0   |
| OP265432 | Penaeus vannamei solinivirus               | SSDLEFLADNES-----ARALCESMDEMGEH                                 | 98  |
| MZ210029 | Fushun monoleptalauta Solinvi-like virus 1 | TIALQMYNIRWKTLPPWPKFKIRKLR-----K                                | 132 |
| KX024775 | Nylanderia fulva virus 1                   | SRTLAFQPKRTGS-----VVRVKYMRNTNEMVEKVVPEQNSEPFVLD-----GVN         | 109 |
| KY070327 | Diabrotica virgifera virgifera virus 2     | LPSVGFLSLIITAP-----IIVKKIKKTK-IQKHPLHNF-----TC                  | 131 |
| OQ540582 | Apis mellifera solinivirus-1               | I-----YPFLLPAS-----KLFERFDKRR-QMIKNFNNLQ-----NEAN               | 140 |
| MN918666 | Picornavirales [unknown host]              | -----                                                           | 0   |
| MW251313 | Icha Creek insect virus                    | -I-----FAALL-----P-----EYRYKIALKNRKR-EVFDDSGKDPGKGLFQ-----D     | 52  |
| MZ822083 | Apis picorna-like virus-4                  | -----                                                           | 0   |
| FJ528584 | Solenopsis invicta virus-3                 | -----                                                           | 0   |
| MW314636 | Myrmica rubra picorna-like virus           | -----                                                           | 0   |
| OL569508 | Corparats virus-2                          | -SNLGFQNLK-----P--IHFKKEKPPQYSIAIPVHENRFSILPESSGGDVNNGWKA-----S | 140 |
| DQ286292 | Rosy apple aphid virus                     | -----                                                           | 0   |
| OP265432 | Penaeus vannamei solinivirus               | LCHPAVEHLDHVPCEFPPQNLSPA-----TSAW-QALLLDEHIARWAHVPLRHRT         | 147 |
| MZ210029 | Fushun monoleptalauta Solinvi-like virus 1 | QSES-----LIDTLKDYFISNRVDLALSILATSIQVMSTIV-----EMFRYKN-----AKQQ  | 181 |
| KX024775 | Nylanderia fulva virus 1                   | QANE-----PMSVVDTLISAAVLIGIPLSTACTISSMLVNIISMLLWEFLT-DK-----TSIK | 161 |
| KY070327 | Diabrotica virgifera virgifera virus 2     | EGDN-----LITDLKNFLVPMLETYALPVAYIATLASSLVTFALTQHYISTPK-----KKRT  | 184 |
| OQ540582 | Apis mellifera solinivirus-1               | QETL-----EVKSITQFIMTCLTFALPIIYITTLTSSLIIGLITSIKTYLIMRK-----DSPK | 193 |
| MN918666 | Picornavirales [unknown host]              | -----                                                           | 0   |
| MW251313 | Icha Creek insect virus                    | FFQE-----MIKHFEVTITPCFTVANFPVTAVANLVSASTMVYVFGQIIRTWS-----KSKE  | 105 |
| MZ822083 | Apis picorna-like virus-4                  | -----MECVNSLNP-SDT-----H-----H-----                             | 14  |
| FJ528584 | Solenopsis invicta virus-3                 | -----                                                           | 0   |
| MW314636 | Myrmica rubra picorna-like virus           | -----                                                           | 0   |
| OL569508 | Corparats virus-2                          | LSKP-----K-----VVYKKRTKKLNP-RKVNYRLKSKIKIKNIQLVHQGLLSW-----     | 182 |
| DQ286292 | Rosy apple aphid virus                     | -----                                                           | 0   |
| OP265432 | Penaeus vannamei solinivirus               | LARNNSTFHETCAELNLPFYFTPTVQRQSISDIILDVIKSELVDTVKESAKNFAKSVNVV    | 207 |
| MZ210029 | Fushun monoleptalauta Solinvi-like virus 1 | IT-----SFLKTNLI-----LSVTNLA-----MSILGLVSISEETVKAVINNLCETPEYT    | 227 |
| KX024775 | Nylanderia fulva virus 1                   | IK-----IALGSAIL-----SFVSMFL-----QL-----F-DYEPT-----EN           | 188 |
| KY070327 | Diabrotica virgifera virgifera virus 2     | TT-----L-VVAMV-----SAFVNLV-----ST-----ALLGIAGTVT-----AEFPWQQ    | 218 |
| OQ540582 | Apis mellifera solinivirus-1               | -V-----G-KVLLI-----NSIVNFI-----ST-----LLLGIAGVTT-----AEFPPELP   | 226 |
| MN918666 | Picornavirales [unknown host]              | -----                                                           | 0   |
| MW251313 | Icha Creek insect virus                    | LKHVLGAFGLSLI-----QFVNLNL-----MI-----INVEIEPE-----EVT           | 138 |
| MZ822083 | Apis picorna-like virus-4                  | -----FENYDEY-S-----QFFDNLE-----KK-----RF-----DN-----R           | 36  |
| FJ528584 | Solenopsis invicta virus-3                 | -----MSE-----                                                   | 0   |
| MW314636 | Myrmica rubra picorna-like virus           | -----                                                           | 0   |
| OL569508 | Corparats virus-2                          | -----SSEVSEK-S-----RLFENII-----KD-----NKLKLEEQ-----SLP          | 210 |

DQ286292 Rosy apple aphid virus  
OP265432 Penaeus vannamei solinivirus  
MZ210029 Fushun monoleptalauta Solinvi-like virus 1  
KX024775 Nylanderia fulva virus 1  
KY070327 Diabrotica virgifera virgifera virus 2  
OQ540582 Apis mellifera solinivirus-1  
MN918666 Picornavirales [unknown host]  
MW251313 Icha Creek insect virus  
MZ822083 Apis picorna-like virus-4  
FJ528584 Solenopsis invicta virus-3  
MW314636 Myrmica rubra picorna-like virus  
OL569508 Corparats virus-2

DQ286292 Rosy apple aphid virus  
OP265432 Penaeus vannamei solinivirus  
MZ210029 Fushun monoleptalauta Solinvi-like virus 1  
KX024775 Nylanderia fulva virus 1  
KY070327 Diabrotica virgifera virgifera virus 2  
OQ540582 Apis mellifera solinivirus-1  
MN918666 Picornavirales [unknown host]  
MW251313 Icha Creek insect virus  
MZ822083 Apis picorna-like virus-4  
FJ528584 Solenopsis invicta virus-3  
MW314636 Myrmica rubra picorna-like virus  
OL569508 Corparats virus-2

DQ286292 Rosy apple aphid virus  
OP265432 Penaeus vannamei solinivirus  
MZ210029 Fushun monoleptalauta Solinvi-like virus 1  
KX024775 Nylanderia fulva virus 1  
KY070327 Diabrotica virgifera virgifera virus 2  
OQ540582 Apis mellifera solinivirus-1  
MN918666 Picornavirales [unknown host]  
MW251313 Icha Creek insect virus  
MZ822083 Apis picorna-like virus-4  
FJ528584 Solenopsis invicta virus-3  
MW314636 Myrmica rubra picorna-like virus  
OL569508 Corparats virus-2

DQ286292 Rosy apple aphid virus  
OP265432 Penaeus vannamei solinivirus  
MZ210029 Fushun monoleptalauta Solinvi-like virus 1  
KX024775 Nylanderia fulva virus 1  
KY070327 Diabrotica virgifera virgifera virus 2  
OQ540582 Apis mellifera solinivirus-1  
MN918666 Picornavirales [unknown host]  
MW251313 Icha Creek insect virus  
MZ822083 Apis picorna-like virus-4  
FJ528584 Solenopsis invicta virus-3  
MW314636 Myrmica rubra picorna-like virus  
OL569508 Corparats virus-2

DQ286292 Rosy apple aphid virus  
OP265432 Penaeus vannamei solinivirus  
MZ210029 Fushun monoleptalauta Solinvi-like virus 1  
KX024775 Nylanderia fulva virus 1  
KY070327 Diabrotica virgifera virgifera virus 2  
OQ540582 Apis mellifera solinivirus-1  
MN918666 Picornavirales [unknown host]  
MW251313 Icha Creek insect virus  
MZ822083 Apis picorna-like virus-4  
FJ528584 Solenopsis invicta virus-3  
MW314636 Myrmica rubra picorna-like virus  
OL569508 Corparats virus-2

DQ286292 Rosy apple aphid virus  
OP265432 Penaeus vannamei solinivirus  
MZ210029 Fushun monoleptalauta Solinvi-like virus 1  
KX024775 Nylanderia fulva virus 1  
KY070327 Diabrotica virgifera virgifera virus 2  
OQ540582 Apis mellifera solinivirus-1  
MN918666 Picornavirales [unknown host]  
MW251313 Icha Creek insect virus  
MZ822083 Apis picorna-like virus-4  
FJ528584 Solenopsis invicta virus-3  
MW314636 Myrmica rubra picorna-like virus  
OL569508 Corparats virus-2

----- 0  
EVTSTKTIQFV---AACDALANAVTRGKA-----A 234  
TFDNFIVD-----VKARKFIGHDL---EKLIREARKNDEF--- 260  
EISDVKTQFSELLTDEKVDLDGIV-----AFQEMCLKARYSPDKI--- 229  
TLDTLQ---DE---IVEEIGKVEDE---KKFVYINEKKKQYVLMCKE---YKSDAF---K 263  
SFSDDIQQATEL---IIEENLEPVKPSPSKREEFIKHVL-----DHQF---T 266  
----- 0  
EIKKA-----LEQTSNLVTDPPFKTTYASKE----- 164  
-----IPQSARYQ--RREDSDSG--Q 53  
-----KTQTFVQNEETHVL--DMTSD--FKSDLSLEKVT 32  
----- 0  
PHDKP-----C-----SSKDTYYNPEQFILEDTKSQ--FHEDDSINIGK 247

----- 0  
-----VALHVASFVSHLLPFAVFVCDLA-----GILPEQGLFTFFKEKAT--EF 276  
-----VVPKSPSLSMKVL-----QKRNDKWEEFNRSQAL 287  
-----QKLYSSF---KVRKNVPYCLPSVNEAQ-----LVVDSKFWT--- 262  
LEQ-AKKIFQSIYADFFSMDMFILPRVDPFPLIVGGKFRAPVSHNSCLVFKAMLEW--- 320  
TPMQINEYFRANY-----SEDFLLPPSRAPLKLP-----QPIR-----DAKDSFDNY--- 309  
-----MNCIVLPANSAPANGT-----LQVK-----DQWM--DFRY--- 28  
-----EFLNHYHV---AGKDVSLPLNSPALLQRA--LNGQ---TGRNFRPCFATYS--- 208  
VVINTG---LAPIVS---EDKIPSMGTGNFLEDM--IVGVISKFSNDKLLTSLVAMQI 102  
SSVEQTDDLVSKEIIN-----NNDLDIKDLSFLRNL--LLSTLQYLGLIAKFVAINITLSI 84  
----- 0  
LVIDQNELFENHMEI-----REESPYEDPSIINNFI---KSIIMEFVSKFNFDAFVSVAIV 299

----- 0  
FNPKNLS-----ELSHSATVDTDY--LFNELTSQP-VHQKLDWSNVLKPEYIFR 322  
LHIRSIMQWNEEDYYAFILFHDQGMDELVSRYFNKLEINVVVMTHTPKGTAPESF--R 345  
-----KEYI--IFYLGLT---ENLYNLIKANPQAPENTFTWEGAEYSGE--- 303  
--P-----IWI--AAYGVVEE---HDEI-----ELWNGAKPTTF--- 348  
--P-----DEFL--IIWNNTNP--RYLFSRSLIKMISPK----- 338  
--P-----DWFL-AKFWDISY--EAIKLRFRVNMSSPQRSSSSWEIQPPMPNIR 73  
-----DEVL-ALYWQQPV--EVVKRFRKAVKECV-----NLR 237  
VSL-----LTVV-FSLWHIK-----KFSKGLLA----- 124  
LSI-----LM---LLINSCA-----KF----- 98  
----- 0  
SQL-----LVVF-GLIWSLRR--SRINRQLKVIII----- 326

-----MSL 3  
AAVVLV-----LSIFAG-----TSFAKNKNMNA-----GMLY 349  
EDM-----TPTEWRIELENTAMTSPCIPSTPHVQKFFKFPILKSNMVTLENALQSMDF 399  
--DPPID-----LQT-----QMDQF 316  
--MDYPEESEQSDG----- 360  
-----PMNEDVRTDDEPK----- 351  
TVPLPSDEDTPDEYK----- 88  
DDPKPKVSVVDEAYVKNVYQN-----IRQ-----RVDDY 266  
----- 124  
----- 98  
----- 0  
----- 326

SKASDLEQVKPASLWITTY-----HTIKQL-----IKEWFIKL-VET--- 39  
TAINAGTTLASKATTAGSFLICSLFGI-----EMPHTLEKK--- 386  
SLVSL-DEWEYVPDWHCHYLLCESNGWLEKNVSQLTNEDEKRNLOKMKDEYFYFARNKKPD 458  
QIVTV-PSDGNCMFWSMLA-----SDAKELTMTNLTKLDSFNALSLTKE--- 360  
-----N-MGQE--- 365  
-----STWRELS-----SDEEVKA-----VKDSFKKK-KQEQA 379  
-----ADWKDP-----SKLPKNA-----HIPRHAYKKT-LGRR--- 116  
Q-----GVGKDPYQAI--SELGT-----IYFLVT-VKHE--- 295  
-----AITLQIT-----SVISTF-----SVIFGFPLN--RKE--- 149  
-----TRIVNLS-----SHILNII---TTLLGLYFQVS--SME--- 125  
----- 0  
-----SSFVGLC-----STIL-----YASKLSFPKK-TIKD--- 351

-----VLDPGEIFFALTAIV-NTLTGIVLSTVTLFR--- 69  
-----A-----EELETKTKIT-HSDY-----ATQA---A 407  
FYWPPETPIINAIVDIVKLDLTIEEGTV--KEEIVKVYHAVE-----S 499  
-----EMQIV-----NTYGAWGTSMDLFWCETHYRSLY-----LAQMNGKI 398  
-----KESIERINQLA-DGGD--ST--- 382  
VKVTMRKPKFDLEKPNFF--IRDH-----KQNKDDWEEIA-RGMD--A--- 416  
-----QTF--L-----NKVRRHWQKIK-REEP-----RPEIQSEES 144  
-----SKENAKLLKQYQEV----- 309  
-----MQDI--ISES--ISSSVNSKF--SLQEHINWLN-VNAR---T 181  
-----IEEI-TQTF--E--NEFGTYDDDKILSHY--IKI--CNLP---N 157  
-----MLNL-FKSF-----TNKNDNKIIDLSSHL-EII--QNLN---S 31  
-----MENI-VRSV--LLSKKEEDVVMNDISSHK--RII--SQFR---S 385

DQ286292 Rosy apple aphid virus  
OP265432 Penaeus vannamei solinivirus  
MZ210029 Fushun monoleptalauta Solinvi-like virus 1  
KX024775 Nylanderia fulva virus 1  
KY070327 Diabrotica virgifera virgifera virus 2  
Q540582 Apis mellifera solinivirus-1  
MN918666 Picornavirales [unknown host]  
MW251313 Icha Creek insect virus  
MZ822083 Apis picorna-like virus-4  
FJ528584 Solenopsis invicta virus-3  
MW314636 Myrmica rubra picorna-like virus  
OL569508 Corparats virus-2

KGTGYLMKIISGVN-----LLSTFELLIIQIARDNSFVPEHAREH-AERR 114  
YEDATLKEYIVQCDDLALCKCTPETA-TLKSRTQTKRDIKAVTNLSQSASAP---MYLQ 463  
RVDQFVNLVLPVKNVVDIDHLDPEQMLYIESQLSTLLRIAIGPREVIEYNDK--- 552  
GHT--VY--FDGG-----MRKTGPPLKIYYPIQEHFNAPIEKKN---VPMK 439  
GHD-----BQELATA-----TVDEGEKTPAEQKPLDNF----- 403  
-----BQELATA-----LDSHVKVPEDVKELQAE----- 441  
GED--MYETLANT-----AIWNH--EPTGF--SQS----- 168  
EED--LLSFATATN-----VE--T--YALGTQGLPPKYEHLND--TEIAT 347  
KRD--ILEYLSRN-----YLNRVSLPIVSFHELAKEP----- 211  
RKD--VVEYISLN-----DLKYIKLPLDISFYELKNDILSKNN 194  
RLE--VHNYYIYKE-----NLFLHLVKMPSCTFDELKNN---KNH 64  
RLA--VRKYIFDN-----KLENSIKLPSCTFMELEDK---FDD 418

DQ286292 Rosy apple aphid virus  
OP265432 Penaeus vannamei solinivirus  
MZ210029 Fushun monoleptalauta Solinvi-like virus 1  
KX024775 Nylanderia fulva virus 1  
KY070327 Diabrotica virgifera virgifera virus 2  
Q540582 Apis mellifera solinivirus-1  
MN918666 Picornavirales [unknown host]  
MW251313 Icha Creek insect virus  
MZ822083 Apis picorna-like virus-4  
FJ528584 Solenopsis invicta virus-3  
MW314636 Myrmica rubra picorna-like virus  
OL569508 Corparats virus-2

LSEYLDYSDTEE-----V-----YA-----NTEQEAESMMVSSL 143  
MVQWNEYTFPSEKDLNFASWTQDTLE-----KCMQFNTFMSVTAL-I 505  
-----IRIIQQVISFYRYLRAQKLRQMEHFPMV---KQFFESISPG-L 592  
GEQWYNGTKIDP--TTTDWAEAAANK--QDE--QKPV--EGVNGQSDSMKDKFDL-A 486  
-----TKE--LEITEEDGKTT-----AYDEPFRISKI-I 429  
-----IKE--IEDALKPKPVE--EPIPLQQENFF--EDSFVSMDSLNKF-A 480  
-----VDN--MEFIELPGNTR--RVASLNLDDYVVKQDSDDELSMKMKWKI-F 212  
LKQWIRGQHVVGK-----MV--REDWFDNSVVPV-V 374  
ENDWIWNEYSDS--FLAAWYGKTVS--FVLEQRRIPIYVREK--QT---QHTVMRS-G 259  
LHLWIFQKFTDE--FLAMWFGVQPY--RISNLRMLVIS--RQGFIPKDLNE-I 242  
LLDWVFETFNDK--FLAMWFGVEVY--KLVLHRRPANIQLINQ--DFSNMKGKETYKM-V 115  
NYYWIFKNFDEE--FLAMWFGVALW--KLESIRS KIPVE--L--EKQSFIDQYVVF-L 467

DQ286292 Rosy apple aphid virus  
OP265432 Penaeus vannamei solinivirus  
MZ210029 Fushun monoleptalauta Solinvi-like virus 1  
KX024775 Nylanderia fulva virus 1  
KY070327 Diabrotica virgifera virgifera virus 2  
Q540582 Apis mellifera solinivirus-1  
MN918666 Picornavirales [unknown host]  
MW251313 Icha Creek insect virus  
MZ822083 Apis picorna-like virus-4  
FJ528584 Solenopsis invicta virus-3  
MW314636 Myrmica rubra picorna-like virus  
OL569508 Corparats virus-2

STILTTLFGALLAGFGLSTKGLE-----GLTTTFRAATTTKNGVFCIKELVDNALKLI 196  
P-----ERHPVSPLYRSLKAKS-----EVVRRILESR 532  
QKLGAWLIVI--LLSISHKILPKFGLFDSAKFAANYMSFSKLR-----TEATKSFTEI 644  
VEIFDKIFGL-LFGIYIK--TTKTNAPLRDLATSFSGLKLLK-----EGAVDTKAAV 536  
DIMFSKVIAL-FASITSCIL--LEKKKITPRITIITALAEAEKVE-----GVVGDFFKEIL 479  
EKIMIQVGCII-IMAIGDAF--VTKKTNLNFSIVDYLSSLKSKIN-----TIGGDLKEAI 530  
KRIGLRITAI-CIYVEDTC--TTKQFSLAGLVKSLRMVDTLG-----KSTEAQEP 262  
KKVISMVIGI-ITSILFAK--ATGSKLSSREIVSGISIGKSLA-----DVGDNDIEKVI 424  
IEFAQRFLGI-VLSWMLHL--IDGKPFVS SVSDGIMIGNITIS-----NCSDDLKIDF 309  
RKLCNMGVSV--IISFIQSK--LFDEPFKKRDCQALKDASVIS-----SPFDTLWNLI 292  
KEFLFRAPGI-LTSYVSHK--VSGERFKASSFMGGIATGKDIA-----SFTGDFPDSV 165  
KQLALRLFGI-TTSWILT K--IHGENFTKRDIMDGIQAKDFN-----TFSGDIIDTI 517

DQ286292 Rosy apple aphid virus  
OP265432 Penaeus vannamei solinivirus  
MZ210029 Fushun monoleptalauta Solinvi-like virus 1  
KX024775 Nylanderia fulva virus 1  
KY070327 Diabrotica virgifera virgifera virus 2  
Q540582 Apis mellifera solinivirus-1  
MN918666 Picornavirales [unknown host]  
MW251313 Icha Creek insect virus  
MZ822083 Apis picorna-like virus-4  
FJ528584 Solenopsis invicta virus-3  
MW314636 Myrmica rubra picorna-like virus  
OL569508 Corparats virus-2

AEEKYDPVY-----FERKAITELEEAQELLRLNIGAIASDNKVRDRIYTIIDKINLAL 250  
QRLWSE--GGD--LCTQPYDRILAKLDSWLQTTAAAFHTPEPRYDFFADLNMAQALL 586  
AELFGMETDRS--KYQKKCADMIELLNSFLAKPAYIYASDVSKISDFKAAETAEAIL 700  
EKIFLEKDPK---QFIAQCEAISKKLHLYMEIPPYKMANSAATLYNEWKNYQREVETFR 592  
KVVKGDPPTDE--NLKRTVTDISTELTKFNEMPTHQFALHPNRTQRFREVIDKAQIVL 535  
YVLLNKETPD---SLSNQAAEFALQFNQFLEQPSHVILARSHLVAKINDTLGDYERKQ 586  
NLIVGRDTHK---TFNKKAEEFRTYFNKFMEIPTFEFAATPTTVYKAKERCEEFDWKY 318  
CGKGFEDVSEAAKEQEGKDLITKYCNVCNEISETEPHVFEKQPHKIKETIGPGQINLFL 484  
IDTFDS--DIKK--YFEKQVTKYVDDLEKFLTEPNYFESSNNLRVYVDISDELKEIRTFI 363  
SKQKDNDAEE---RFTQTILDFTSEFDNFLGIPNYKFAKNQKLVNTISKSLDACAFTI 348  
TKNFFK--HDD---PILDITISKYQKDFDEFNATPTHQFMNKNRIYDIDSKLNAKCEFTI 219  
TGISVN--KRS---FYRIQSEYVVKHFNFSLEIPTYDFVRNQRKIHIDINSMLEDCKFTI 571

RNA helicase  
(P-loop NTPase domain)  
(AmSV1: 630-750)

DQ286292 Rosy apple aphid virus  
OP265432 Penaeus vannamei solinivirus  
MZ210029 Fushun monoleptalauta Solinvi-like virus 1  
KX024775 Nylanderia fulva virus 1  
KY070327 Diabrotica virgifera virgifera virus 2  
Q540582 Apis mellifera solinivirus-1  
MN918666 Picornavirales [unknown host]  
MW251313 Icha Creek insect virus  
MZ822083 Apis picorna-like virus-4  
FJ528584 Solenopsis invicta virus-3  
MW314636 Myrmica rubra picorna-like virus  
OL569508 Corparats virus-2

TT-YRH---QDSANMRSLLATMAGELNKKLAEVESLIPTQVTAQGVYLQGERGVGKSSLC 306  
KNPINDHTRAHSMILTSSYVKA-KQHLAELVK-DAAQASRPPTVVIQLVSEFGHGKSRIT 644  
AEAITPEFKAISQVMNGVYTSAN-KKKRLEITSSSTLLSTARPEPIVYCFQGLAGVKTQLA 759  
LN-APKEYANTVRSLSSLDAS-SNLITQITACMQHKSLEPQEPVAVLFTGTGGIGKTQAL 650  
NS-MEPKIRAKFPILLQTAITTS-TVRRKNELLTTELPSPLOQREPFLVLLRGPEPVGKTELS 593  
RA-LKNEDQKHFTGLHGLYAAA-SKKRFNFITSEMPILSRQEPFVLLQGGTGVGKTNLIA 644  
HG-LVQEEKQKIASVYTLNATT-RTRIQQFFQTEIKQMARQEPFLILIQPGGIGKTQLA 376  
NE-OPKQQSNLIALRGLYQAA-NIFKNQLLTNKMPSFVRQEPFIVCLSGPSGIGKSQLA 542  
SD-YPKEQQQIIPILMSIFAAA-SKKRKNELLTSMSEFHRQEPFILLRGPGLGKITYFA 421  
RD-CPKDKQTEIFPPLQGLHTAT-VKRRNEILTVMKPFARQEPFVVLFQPGGIGKTHLV 406  
RS-VPRDRQHELEPLQGLYNSV-CQRNNDILQNAIEFKRQEPFCVLVTKGGIGKTRLI 277  
RE-APKEYKLLPYIQLSTAV-YKRNKELLTSSIPNFKRQEPFVVLFQGGIGKTSFI 629

DQ286292 Rosy apple aphid virus  
OP265432 Penaeus vannamei solinivirus  
MZ210029 Fushun monoleptalauta Solinvi-like virus 1  
KX024775 Nylanderia fulva virus 1  
KY070327 Diabrotica virgifera virgifera virus 2  
Q540582 Apis mellifera solinivirus-1  
MN918666 Picornavirales [unknown host]  
MW251313 Icha Creek insect virus  
MZ822083 Apis picorna-like virus-4  
FJ528584 Solenopsis invicta virus-3  
MW314636 Myrmica rubra picorna-like virus  
OL569508 Corparats virus-2

NYLSAYLAEVF---DWSPAVYNISPGVRFYEPYLNED-FGVLFNEFGS--TVDRDAFSVD 359  
TDLHIPDVANLLGI-SPSTYFINI-SENGHWSRYLGQN-FAICDEYLK--CMSKDALFKH 699  
LELAKQGLGEKLFHPVSETRIIHVTSVDKYWPRINGQP-IAFFDESASTADLERCLLWLN 818  
MNLAYKVKEKLYPGMTYHEAIGTYPPSQKYWPTLHGEP-IGIYDEVASCTTFADEPLLD 709  
LQLSRWFAKEILQK-DYHGSFVQITPSDKYWPPLGGQE-IALFDAAATNLDLTLDFSN 651  
DEIVYRAARDILRV-SPASAAVDITPSDKYWPPLGGMKDIYKFEACATTDIEKDLDFSN 703  
KLARKVCTEILKC-DPNNDIAEVTPTDKYWPSPGGHA-VAIFDEAASADLKLDFLKN 434  
NYLIKFDITSVLKQIEGLNNVISINSQDKYFPPLSGQR-IAFFDEAGTVKDFSKDLFLGN 601  
QHLAKRIVRELIPDGLKRDYIEVRHDDKYWPPLAGQR-VAFFDEAGTVNRNIADLLFSN 480  
QQLATKCVNSFYQDH--EDDYIEISPDCKYWPPLSGQR-VAFFDEAGNLDLKLDFLKN 463  
QDYLSETLKFMDNATSAHDYIEIRHDDKYWPPLSGQR-VAFFDEAGTYQNIENDLLFSN 336  
QQLAGKCTTKLINDGSMRDYIEIRHDDKYWPPLAGQR-VAFFDEAGTVADIKDDLFSN 688

DQ286292 Rosy apple aphid virus  
OP265432 Penaeus vannamei solinivirus  
MZ210029 Fushun monoleptalauta Solinvi-like virus 1  
KX024775 Nylanderia fulva virus 1  
KY070327 Diabrotica virgifera virgifera virus 2  
OQ540582 Apis mellifera solinivirus-1  
MN918666 Picornavirales [unknown host]  
MW251313 Icha Creek insect virus  
MZ822083 Apis picorna-like virus-4  
FJ528584 Solenopsis invicta virus-3  
MW314636 Myrmica rubra picorna-like virus  
OL569508 Corparats virus-2

ANRICSSDPNFESAGLSGKVMCQLKALFVTTNVLNPDIKELM-----PNAVSFAWDRF 414  
IAETIASARFDVNSAEIAGKGVFPQSQVLFINSNQRTCTFFELS-----PDHVDALHSRI 754  
IRALASPASFNCEAAAVDLKMQPCPFKVIITTTNTQLEKLRLIAEYNGMDAIVPAFSKV 878  
IKSIVSAVHFNCEGAALSQKQNPQMQLHICMSSNQLEGLQKMASDQFDKSSVPSFWRR 769  
LKIGICSPAYFNASAAADIAHKINPIHFQVIFATINSTFDNLAAARVTEFSDNVWAAMCRRA 711  
MKGICSPAYFNACAGADVEHKTNPTAKIIVATSNITDSDMAARVSEKTDPTTQAYCRRM 763  
KTSICSPVLENAAGADIAHKLNPIFYKVIIATMNTSLQNFSDRVSMYDQESMDACARRI 494  
IKGICSRNFFNAAAAADIIHKTNPTFYFVIIAATNTTPDDLVKRYGATDSSSIPAMYRRM 661  
IKGLCSAYFNCPAADVEHKVTPCPFHVIIATNTSLELDDIQGKYAGAFAPASVYSMWRR 540  
IKSICSPAYFNCAAADIEHKISPCPFELVFATVNTDLTLQSKISSFTGQASVFPPIWRR 523  
MQSICSSAYFNCPAALTKVTPCPFQVVIATNTDLYTLQGRVSSGMSANSVYFWRRC 396  
IKGICSPAYFNMPAADIEHKVTPCFHILFASVNRRLDLQAKLSLAFSSDSVYPIWRR 748  
: \* : \* : \* : \* : \*

DQ286292 Rosy apple aphid virus  
OP265432 Penaeus vannamei solinivirus  
MZ210029 Fushun monoleptalauta Solinvi-like virus 1  
KX024775 Nylanderia fulva virus 1  
KY070327 Diabrotica virgifera virgifera virus 2  
OQ540582 Apis mellifera solinivirus-1  
MN918666 Picornavirales [unknown host]  
MW251313 Icha Creek insect virus  
MZ822083 Apis picorna-like virus-4  
FJ528584 Solenopsis invicta virus-3  
MW314636 Myrmica rubra picorna-like virus  
OL569508 Corparats virus-2

IIIKVIDPLVTDRRK-----Q-VNHFEPDFSHLSFKIYELHSDGELPKFKML 461  
MTIQVFNPEWAKY-----VADCKQRGTVPPIRTHPVNRDPKRVKFCALCSFGTANE-IVSKKFL 810  
RVY---SCSATEA-YGPFVLDNRNS--I-RYDSTGKFRHLTLHRMKIDSQESRQFVADQL 931  
QTY---ECARPDN-MPPFDP--NN-PQ-PGDFRKDYSHIYFNKHVDVKTGTTRFLQL 820  
IVI---DMTWDQKM-VGNLSKSDTLGK-DKPKKKNFSHANLSQRMD--GGKLQYKHI 764  
III---QVER--VSK-HFD--PNYPEQ-DTFDAENYSHLKSQFEHR--DGKLITKQL 811  
IVL---TTEWNPKAG-HHN--PNEPWS-NAYDKKNFTHLNKIKQKN--KGVYVDDKPV 544  
IFI---NVSHVNEFDPTRC-----S-EQDYKSDFSHLRLNKNINDIGSNKVSILGNYV 710  
LVV---DCKWAGE--TKLNL--ND-PTGHRSDFSHIEFTCEWDDSKSRMVKTEI 588  
IVV---ECSWNEKELGPFNY--KN-PSGHRSDYSHIIMNYSYDDKTQRLALEKEI 573  
LAI---EVEWNADLMGEFNY--RE-PTGHRSDMKHLRIKIMDQNKQRMVFSKL 446  
IVI---TTEWNEQRFKGFNF-----VN-PQGYQSDFSHLKFKINQWQQTQRLAESDI 798  
: : : :

DQ286292 Rosy apple aphid virus  
OP265432 Penaeus vannamei solinivirus  
MZ210029 Fushun monoleptalauta Solinvi-like virus 1  
KX024775 Nylanderia fulva virus 1  
KY070327 Diabrotica virgifera virgifera virus 2  
OQ540582 Apis mellifera solinivirus-1  
MN918666 Picornavirales [unknown host]  
MW251313 Icha Creek insect virus  
MZ822083 Apis picorna-like virus-4  
FJ528584 Solenopsis invicta virus-3  
MW314636 Myrmica rubra picorna-like virus  
OL569508 Corparats virus-2

-YEKL-----HINDILQILRTK-----LALETRAF-----YHRLNHFM 493  
DYDNLVKFIARLIQDNDTQRSTALTITDDLDADQITQVTPAPVNYQFQPDMSRQGVAFED 870  
-----STSFQDLLEALA-----WYDIKEI-----EH--953  
-----TMDEVIADTVS-----RQTQKN--R-HQVEM--844  
-----SVSOLKTLIQD-----AHRHECG-----EF--784  
-----DLKRLMRMIED-----KENFMAN-----KH--831  
-----QVKDIMEMAKQ-----REAHFSK-----DF--564  
-----STAALKDMIVD-----RYGKAAT-----EF--730  
-----GPEKLFNIAAK-----MYQKKYI-----EH--608  
-----NFDTLFDMIRL-----RFRKKQQ-----EH--593  
-----SREELLEMIRK-----RYRKMEA-----EH--466  
-----SVEDIYELIRN-----RYRKMES-----DH--818  
: : : :

DQ286292 Rosy apple aphid virus  
OP265432 Penaeus vannamei solinivirus  
MZ210029 Fushun monoleptalauta Solinvi-like virus 1  
KX024775 Nylanderia fulva virus 1  
KY070327 Diabrotica virgifera virgifera virus 2  
OQ540582 Apis mellifera solinivirus-1  
MN918666 Picornavirales [unknown host]  
MW251313 Icha Creek insect virus  
MZ822083 Apis picorna-like virus-4  
FJ528584 Solenopsis invicta virus-3  
MW314636 Myrmica rubra picorna-like virus  
OL569508 Corparats virus-2

PEVLQKIVEAETNPV--GSYAFKYF-----GQEKVEENSSGRDFC 533  
LRPVTM-IEA-KNKTVKNGALSCIFCKGGHLSCTCTQFVQGPHEAPRWQAGPVDSCVNLH 928  
-----AALLRKNFY-----AKKQSKTARLHL 975  
-----DKLLET-A-----ISGVNQSDSADHF 865  
-----ERRIRLD-Q-----CIQESPAARHTF 805  
-----RAHLA-K-----MALVKENSITHY 849  
-----TNWLHLK-----NQKPESSGSKSHY 583  
-----DQN-CL-N-----SMKESNTNVQHF 749  
-----KRNIDLO-R-----VEKQAEHRMHY 627  
-----DTKISIL-N-----NEIQRSNSKQHF 614  
-----VFRLNMQ-G-----LVKQV-DQRIHY 485  
-----SRVIDNM-N-----MLKQSNLHSHY 838  
: : : :

DQ286292 Rosy apple aphid virus  
OP265432 Penaeus vannamei solinivirus  
MZ210029 Fushun monoleptalauta Solinvi-like virus 1  
KX024775 Nylanderia fulva virus 1  
KY070327 Diabrotica virgifera virgifera virus 2  
OQ540582 Apis mellifera solinivirus-1  
MN918666 Picornavirales [unknown host]  
MW251313 Icha Creek insect virus  
MZ822083 Apis picorna-like virus-4  
FJ528584 Solenopsis invicta virus-3  
MW314636 Myrmica rubra picorna-like virus  
OL569508 Corparats virus-2

ILRLQGPETGKTTL-AMKLAEKWTELTAFEGKSRKYIKQSSNLQFVPSDSTSTIYVLD 592  
VFHLYGKPGFGKSHTTINHIHPALQTLTKL---HSVILDSFDEI---FETPMIVFID 979  
SVCIFGLPGGKSTL-VEKILEPDLVSATTL---PIVNLSEDTII---PKHKCIFVVD 1025  
VVNINGRAAAGSKRL-LEAAVSDFKVLNLY---QVVRYCDLEKRMAGGKRLKKRVILVD 920  
SVVIHGRTGQGTYYT-LEQQLANLTAFAY---PLIRINNVYDIKNLPVQRSRAIVVMD 860  
SMVIHGQQGQKSYF-IEYLIRNMPSAFNF---PIHYIKESDLLKFRKQTKRCILCID 904  
SVVFHGRAGQKSAF-AMESFVRLSESLHF---DGFVAKSFAEL-SKLVFKKRCVLLID 637  
SVVMHAGGGHKTP-L-IGQISNNLSKVLRL---PILKLFSENDINNLTQNSRSIVVID 804  
TLHMHGPPGQKTPA-LLNLASKLSSLYSM---PVFVIKELRDFQQLRPFKNPSIFVFD 682  
SVCLYGEPPGQKTYN-LNKLITT-----FANATNLKI-GSEEEKPSIHF 657  
SCHLRGPSSAGKTPQ-LEQISKQLSINFKY---PIINEEFNQLKQ-T-YDFRIIATVD 538  
CVHLHSGPQGKTPS-ILEYAKSLKRIYSM---PVKIFTSWDEVK-N-HHSNTRSYIILD 892  
: \* : \* : \*

DQ286292 Rosy apple aphid virus  
OP265432 Penaeus vannamei solinivirus  
MZ210029 Fushun monoleptalauta Solinvi-like virus 1  
KX024775 Nylanderia fulva virus 1  
KY070327 Diabrotica virgifera virgifera virus 2  
OQ540582 Apis mellifera solinivirus-1  
MN918666 Picornavirales [unknown host]  
MW251313 Icha Creek insect virus  
MZ822083 Apis picorna-like virus-4  
FJ528584 Solenopsis invicta virus-3  
MW314636 Myrmica rubra picorna-like virus  
OL569508 Corparats virus-2

DWVSSNLQESSAYVTKMNATNNDLSFIITTNVEIKRRLPWCELPTRIIMGL-IGNPYN 651  
DMVLD-----DAQYLRWWSAQ-P-VSHIVVLCNMMKAKTDKWKTRKDYFRRLSKSVEDS 1033  
DYLVPQADPIREKQFMDLYNNQMENNIIIIACTNKIPWRIPTGVFTFVLE-GFTIEPVYI 1084  
DDIF-LNSPEIEQKYMHCYNNILANGSVIFVATNISPGYSR-----IPVIG-T-----NGY 969  
DVVKENPSSLEQEAEMEMFNKLVHASIIVTVNVSPKFG-----SFTLV-G-----RDF 909  
DVIRNTADPEIENAFMDIYNNRLAPCSIVVNATNVSPKFT-----IPYLV-G-----THF 953  
DLLRETMIAEENILMDLYNERLHDSSVVFITNVSPKFT-----IPIFD-A-----LSI 686  
DVIKIGSDLSLEKSLMDLYNNKLYPNSIILSATNLSPKYSA-----FKF-T-T-----KGI 853  
DIFDNNSVELQHEFMNIYNNIMPNNISVLVSSNISSTGYSM-----KPYLN-L-----TNI 732  
DYI-KDENDENCSEKFDIYNNKLPNNSVIFSAITNVYKTHF-----FPTFF-L-----TNL 706  
DIFHSRNTAEELDLFMKFYNLRCADGSIFLFASNLNYSR-----IPKVS-Q-----LTL 588  
DMFINQLSSENQIYLDWYNNRIIDSSIILICSNLKIYK-----LPIIR-G-----TNL 941  
\* : : \*



YPYDMNPFKGLYPGILIGIDDLYSVNGKVKHSVTSPEYCMVVTDEKCVLTATGKKN-VG 710  
 RFFKKILKE-KVPGVLRRLGIVGVKFDNNW-ESTQS-GRCFHVGSGCI-T 1079  
 KQQOYLPT-YPEGLIRRVYWGQDFLFS-DTNLGNLNLICLD-NRTYQNVQQQ-LT 1135  
 KIIRTSPF-INEGMVRMRVYIGSFVDLT-GSSKHGIEFAH-EEELHYIPKQDV-Q 1020  
 TISRKLKP-QNEGVARRLYGKGVINGI-VMTIANIELHVE-NFRFHVVQSGSLGRF 961  
 CANRKLPLF-TNEGMRGRMYVGCMDGN-YLPTNLTIEIVS-NQTTYKRDNSNLT 1005  
 VPQRSLPF-NEGLIRIRAGFGKYYHGA-LAPSTGLEIRCN-MNRYSYFDQVRSIL 738  
 LLLKNHFF-VNIGVTRRLGFMGAFDTG-YTPNPNLDYKVV-KSKLIPEDFI-IP 904  
 YFPRTLPF-KVTGILIRRLGFCGRFDGLDGMGNAPRYCYCL-NNSFNRSPQH-N 784  
 IYAFIQQF-KQVGLYRRLGFDGYTIDP-NSSVNAPIFVQ-NKFKYERQK-HE 753  
 AIDRRHPF-DLPGITRRIGLGNFNAGE-VMPSYNDEIFIN-NBQQGTPEPVTY-IP 639  
 AIDRRHPF-ENLSLIRTRIGLGRFANE-LVFNVYNVEFIFK-NDQAXYRIDEIS-FF 992

[illegible]

```

----- PYIIVENIKKKRFISMIENRYNIVTIGRRPENELPTVDFEIKAAANK 755
----- SINDPNKADIMLMDFSDYSIENKAVGASFSTM ----- SVLKAASK 1124
----- SSQQKLRQIQVGAASMLVYKYNKAISLNDADGTGVKIQSVPTDRPNAMINIFYAESI 1127
AGVSPALFAFNMASTYRDAKDMITYKQMKWLDSSRKDYLVVYVEPTPTVDNFIKIFANRA 1130
----- CPEFEYQEGLTPQDLPNLYVTKYGAFTIEETKTSVQHGLVTKPDDCNFEIYAKSS 1133
----- LWTQDKQQGGFEKRLDLQAQVEYKGRDFDMSRTEPIHYHRTFKMDDNLLIKATRT 1101
----- YLGMTETEIRLEDLVPAFYEGYKAVILAKKDVAVRYNVLRIETGTYNLLIDESA 828
----- NHFTKFKHSICSGDIEKVVLSYQNFNELHTGLKTIYDQELTGDFNMILMAERA 989
----- SLRLRLDMLVDIVEDAYSSYKFLSMRHRDPTINIVD-ELPNAEYVFCITKPR 867
----- LKFIKIDILDKVDVNYKYVRYNFISSLKQTEIVYEYPPNLEVEDFFNMKNKF 833
----- KKRNLKFLTKPLTPNLENYVRYNMAFYKKSDDFVVEGEIPTSDSFYSQLEADSI 737
----- KNSIDSPPEOYIFDRSDYDFIKMKRDOCTIEGSRD-TIGEYDYILOSESI 1074

```

DILF-----KKLSTSLG-----AASLYLKPDAEASLYVSERVISGIAEVNPDKAIRPSD 1202  
GKIVTRPGLSGTANVLSDMLKPLE-EYFISNLETRFAFVS--VSRVTSYARSFVSFI 804  
KNTIK-----IPADVYIQLPHIFSGE--TIDKAVVWPWKIRIDNISILVLPNMSKFLVSSQ 1278  
CDVR-----LSHNYLEMNNIFIDYV-KFDKCDLPAWKLIFTRDVFACMKDRSKFSIN 1184  
DVVE-----FKADPYMEKHYFLYDRA-EYACDLWLKYLDKFLVAFALMDNNKKFMIEK 1107  
DDVI-----MSGDIADLSKHVFCNKS-LYDRCDLPKWLKYSISPETCSFKSNKYELFMCN 1155  
NCFM-----KYNTISELDKHVFLHNS-EFDRSVANWKKLHPLISVCRGISLQQLNRLVSSY 882  
SDTK-----ITTNPFDYIDNVFYSKE-KFDNSNPGWKKFFLDYLNLYKKMYDHSENFINID 1043  
QETI-----LPRNIQLDQYVITISKQ-VYDSDHSHWKKMYFNSDIAKKLRKVYHKFINDT 921  
HRSV-----FNNFP-ELDKYIHFKNNSYENLHFDWRMYLSPRVKRLALSVEKFITISI 887  
KQVD-----FKILDCSTQKTYITKNLFSK-NATDPKWLYISDRLTAFPTDQYFEVNC 792  
EKLN-----FSTDKISNTIRHLS-KLHEFDKDNSSWKKMYVTNLIETFFNNYELFELDS 1128

```

FICKEVFDEITIPTEERYTTIVERVSVLLQYFKDP-TFRV-----VIQDE-KRVVYSE 855
      GDDIVFDAL-AMRKLIKNSNLSPVQIFSTRDKKQVILIRDSASGRKYTYD 1249
VKTREDLVLMKIKSYVNLQSNLVNDIVISV-----VIRDL-G-KFYLE 1319
NFTEDVLINVVRRYVDGFTALGIEP-KLLA-----DIGDQ-G-VXAFV 1224
GLDYGKIKLAIIVQRYVMGLTGQIGIAP-RFYV-----IQDGT-G-KFSFL 1147
GFSEELMYTITVRKYVNALDSGIEP-KFYV-----EIDDL-G-RLEF 1195
NFDEESIIISLIKRYSGAFAMSGLEP-RFYA-----EFRDI-G-RQFE 922
EFNTDTIFSLVQQYAMEFAKLGIPA-RFKV-----HVGDL-G-KFYLE 1083
NLSDEVVTRELRRKCAISMLEYGVQV-VMLI-----NLNL-G-RYAF 961
EVNKEIIIEELKRYVLLFGQNIPD-NMEI-----NLGEY-G-SFYI 927
GFYDLACIELKRLAIRIMSSNNIN-NIRV-----FFKDV-G-EFSVC 832
QFSDHLLIKELORIALRITFOYGISP-KIKI-----TVKNL-G-EYYLK 1168

```

```

NGVYYYYEDKEDTR-----ISFEGYNLIINVSTPKMVFYPDFAMALNE--DRIEK 903
SEKFIITVTTTTL-----QDVSWYQ--GLPL 1272
QGVLYMDVQVQNNNTVITPQQAIVITNENADV--LRRYDYDSFFN-AFKFNILP 1371
NGKILHVGKERVVVNYCYFTSKDD-----EWFVEMFNKVMKWNLSILGHNGEHSIPT 1277
GNCVMAEVENPAKNEICLVHTD-----GT--RVAIMEEMQWQFCDPVDIYNP--QHA 1198
DGEISSDLRTETPA--LLN-FA--IVKTELYLMLFGE--HTVPVVRMIK-EP--ELAE 1244
NGVLSISKFNEGNEHQLN-LIPRIHVFEQEPRIFFMD--KTVNPGKLNGYTA--DDAF 975
NNFNFINLNT--HTNSNIHTVHQDRIILHVSNNVTECLTDVMD-YA--TWWS 1130
QGAIIYQKYNDS--NNDNDIAFCISHTSIVLNSNTNLIPLIDFVFGN-NI--NVAI 1012
NGKILHMTINIESNV--SEI--PVPTDGVVY-I--SEHKIPITLDFD-NI--NINS 974
DNLINLKLINKI--NKTNSYIAHTNSVLIYGCCTINIPIDLEIFAKT--NIAT 884
DESVIVHYTESISRV--DTASDLYLATNENGLIFDNNCKRVDISFEDVLY-CS--NIP 1222

```

DQ286292 Rosy apple aphid virus  
OP265432 Penaeus vannamei solinivirus  
MZ210029 Fushun monoleptalaute Solinvi-like virus 1  
KX024775 Nylanderia fulva virus 1  
KY070327 Diabrotica virgifera virgifera virus 2  
OQ540582 Apis mellifera solinivirus-1  
MN918666 Picornavirales [unknown host]  
MW251313 Icha Creek insect virus  
MZ822083 Apis picorna-like virus-4  
FJ528584 Solenopsis invicta virus-3  
MW314636 Myrmica rubra picorna-like virus  
OL569508 Corparats virus-2

KFVGTLSLTITETIETIIEKYYKRAIL-NK-----VCNPFVAVATRELQL---KRMKDP 953  
EA-----IIYL---MKNHQVIEEHFPLTLK-LKKKARRDRNM-----QIV 1310  
AN---ITKDDLETAIRIQEAVRDQKIETDP---AYIHNLNKNWKNKETKTIVLVEALKLK 1424  
EH---NLNLQETEIFV---NQFQQLK-ATQEFVNLQNVSGNLFEGKVQRAVAVK 1326  
DN---SKMQLTSVIAIRFVKTPRFLNHP---SIKLLLNWQQEEIQDLAMVKSFA 1250  
TL---NLSYNESIENNYIKSDTFLSSE---AYIQTHKVVVEEIASFAAAKWKLT 1295  
KD---GLTFDESAILFKYRTSSEFLHP---NVVKETRIQAKEDAKVEAALIAKMK 1026  
TN---KLNATAREISTFIDSIQFAQNP---HFIAPIKNYRRQKMNQDQLLARGIEVK 1181  
KY---ELTLLEALEYSKFVKSSKFLSLD---HIRKFLVEKQKQDFQDWSMRKYKLT 1063  
KY---NLSFDQSIALNSFKTGDSFYSNA---KVRKSLSKFVLLNLYQTKFKLYLKEAK 1025  
KY---KLNVEQIREFVITYIESSEFVNPN---MITKLHNFYSQQCTRRKQQQKFKELK 935  
KY---KLDIRQSKLIYAYIDSNQFQNSV---DYKNFLNNRYQQISFLTQNIREFKT 1273

DQ286292 Rosy apple aphid virus  
OP265432 Penaeus vannamei solinivirus  
MZ210029 Fushun monoleptalaute Solinvi-like virus 1  
KX024775 Nylanderia fulva virus 1  
KY070327 Diabrotica virgifera virgifera virus 2  
OQ540582 Apis mellifera solinivirus-1  
MN918666 Picornavirales [unknown host]  
MW251313 Icha Creek insect virus  
MZ822083 Apis picorna-like virus-4  
FJ528584 Solenopsis invicta virus-3  
MW314636 Myrmica rubra picorna-like virus  
OL569508 Corparats virus-2

SYVRGLMRLQNNYLLKGLCGLAGVGSVALLYGVYKLIVSTMKQEKITDNANFVGST 1013  
QQITNSKAFQVGF-----PIAVIGVAATAIFGIAKL-SS-KKK-----EES--- 1349  
DKFTEFSGTMVGKVFSLVGLALFFVTKGVFLFGSNETAL-----QKGRKEF--- 1473  
EKVSLFLETQPKIVRFLLYIFLVSGTIAVVYKLVKSFNG-DKMEQ-VAKGARKV--- 1380  
EYRSFKHEPLGKVVMIETIWWGLKIIRKLTSGLGILEGKSKR---RRQAKQV--- 1303  
DTIKKWKSHPIFKIVLIIFTIVATATIIIRIISFING-NSMEQR---RKGSKKGN--- 1347  
DQFMFAVHPLGLITIVIVGIITSVVLLKAISAAFSGDDEQVPEK---RRTGKRAS--- 1079  
QTIEGFLSGPYGKIVKVLAAILASIAVITAIV---HIREFVLEKQKQDFQDWSMRKYKLT 1216  
DKVEEIKRQPFYKFLICLYSILALFLVSAVAYKIFGYFFKTRKRVNN-IC----- 1112  
DKVRNFKETPIGHLISILITIFVICYASFKIYSKFSNFFSKDQAIED-QRKGEKKI--- 1080  
DKLTNFFITPTGFFIRSLMEIIITLITLIL-----IMKMV--- 970  
RLLIKFFGTPEGRLGEFFIVGMIFFLFSMYRVFNIGSSFLKSKRVQDD-PELEAQIF--- 1328

DQ286292 Rosy apple aphid virus  
OP265432 Penaeus vannamei solinivirus  
MZ210029 Fushun monoleptalaute Solinvi-like virus 1  
KX024775 Nylanderia fulva virus 1  
KY070327 Diabrotica virgifera virgifera virus 2  
OQ540582 Apis mellifera solinivirus-1  
MN918666 Picornavirales [unknown host]  
MW251313 Icha Creek insect virus  
MZ822083 Apis picorna-like virus-4  
FJ528584 Solenopsis invicta virus-3  
MW314636 Myrmica rubra picorna-like virus  
OL569508 Corparats virus-2

PKRAMNSQSKDKRKLGVTLTEPIIENSPHQ---K-----HR----- 1048  
-PKSK-----P-----SHHSDS----- 1361  
-IAKFHGLKSKNQRPDLILLIDPEFICSECSNNWNWSCVHIIEKHPERQWVCYNCENK 1532  
-RAS-----KANTDE-----D----- 1391  
-VES-----ETSS----- 1310  
-PKS-----KYDSDD-----DH----- 1359  
-PKS-----RNYSDDD-----DR----- 1091  
-----KYFNE-----N----- 1223  
-----D-----T----- 1114  
-KKI-----TNYSDSG----- 1090  
-IKV-----INWFNTD-----N----- 981  
-AKV-----KTWNKEK-----RDQFWSIWANRE- 1350

DQ286292 Rosy apple aphid virus  
OP265432 Penaeus vannamei solinivirus  
MZ210029 Fushun monoleptalaute Solinvi-like virus 1  
KX024775 Nylanderia fulva virus 1  
KY070327 Diabrotica virgifera virgifera virus 2  
OQ540582 Apis mellifera solinivirus-1  
MN918666 Picornavirales [unknown host]  
MW251313 Icha Creek insect virus  
MZ822083 Apis picorna-like virus-4  
FJ528584 Solenopsis invicta virus-3  
MW314636 Myrmica rubra picorna-like virus  
OL569508 Corparats virus-2

-----GRII-----PNKKRV 1058  
----- 1361  
VNWTATPISCEYSCSWQYFMMHVLVYXNVCDDDYDKYFTDFC-FMCQGEQTSQ----- 1584  
----- 1391  
----- 1310  
----- 1359  
----- 1091  
----- 1223  
----- 1114  
----- 1090  
-FKDK-----DMII----- 989  
DDYLLD-----ERSLDEQFALRKMHYVPS-----HYTDVRRRVLVGPKDSRPPLNDKV 1399

DQ286292 Rosy apple aphid virus  
OP265432 Penaeus vannamei solinivirus  
MZ210029 Fushun monoleptalaute Solinvi-like virus 1  
KX024775 Nylanderia fulva virus 1  
KY070327 Diabrotica virgifera virgifera virus 2  
OQ540582 Apis mellifera solinivirus-1  
MN918666 Picornavirales [unknown host]  
MW251313 Icha Creek insect virus  
MZ822083 Apis picorna-like virus-4  
FJ528584 Solenopsis invicta virus-3  
MW314636 Myrmica rubra picorna-like virus  
OL569508 Corparats virus-2

SKRQYTSSNTSSSSSSSSNCSESSDSSDSSNLSHPSEHSIKITDNSPHTKRRGKIIPNNK 1118  
-----SSSE-----SESDDEQSAPOK-SEK-----SQTR 1384  
-----RVVKLRK-RAP-----GTRK 1598  
-----SDDHFDPRANAR-----LAQL 1408  
-ESET-----E-SEVENQSKLGSKK-----PSKK 1333  
-YRRQAD-----SSDDEEDQRKSGSK-----GNPK 1385  
-RREVNT-----SSDEDDYYEKRTSRK-----AAPK 1117  
-----EKEAIGDRKR-R-----PKKK 1238  
-----DSECIDIEQDFGK-G-----GKKR 1131  
-----VQPQRKGEK-----PKKK 1103  
-----YDEGNNVDEAKK-NK-----PRKK 1008  
NPSEYSPTDI-----SDNEENIIGHQQLDQN-----EINY 1429

DQ286292 Rosy apple aphid virus  
OP265432 Penaeus vannamei solinivirus  
MZ210029 Fushun monoleptalaute Solinvi-like virus 1  
KX024775 Nylanderia fulva virus 1  
KY070327 Diabrotica virgifera virgifera virus 2  
OQ540582 Apis mellifera solinivirus-1  
MN918666 Picornavirales [unknown host]  
MW251313 Icha Creek insect virus  
MZ822083 Apis picorna-like virus-4  
FJ528584 Solenopsis invicta virus-3  
MW314636 Myrmica rubra picorna-like virus  
OL569508 Corparats virus-2

IEQIKQPDNDQETQKEDYTKL-PHEHV-CTTCGCLFTHIHFNKNF---LHPTQYACPNY 1173  
--VA---RKSKQSAPEKKERPNTKVL-----RKQKQSEPHNLKSSTKVARKKQPS 1430  
--VKKVTTDDCKHQGKW---DSSSDESDF---GIQKKRQPKNKR 1637  
--QARYPNHNSNEE---LQAA-----M--- 1424  
--VG-QASDLDKKVQ---KKKLTKGAKPKA 1358  
--SKKYDSDDKKRQC---LQEG---RKKATKKGNNPT 1415  
--NRRESDDRRREF---LDSVYS---ERKKSRAKAMPN 1149  
--VIHSDTEEEAVGDRKRKPKRKVIHSG---SEDEEAV---GDRK---KRGTK 1282  
--NPKYYSVDEQDKGKSGRRKNPKV-YSD---IQDNF---RSRI 1167  
--VTNYDSGVPQPSNVKEVEEIKLVFDPGKLLFGNDFTSEL---ETLVELEKDDDEF 1158  
--TVKYDTDEDRQAPKR---P---VKK---VNPT 1034  
--ILGYKHDL---KKGKKR---P---VLFDGNDTEPER---RSHKK-GKKRPIL 1468

DQ286292 Rosy apple aphid virus  
OP265432 Penaeus vannamei solinivirus  
MZ210029 Fushun monoleptalauta Solinvi-like virus 1  
KX024775 Nylanderia fulva virus 1  
KY070327 Diabrotica virgifera virgifera virus 2  
Q540582 Apis mellifera solinivirus-1  
MN918666 Picornavirales [unknown host]  
MW251313 Icha Creek insect virus  
MZ822083 Apis picorna-like virus-4  
FJ528584 Solenopsis invicta virus-3  
MW314636 Myrmica rubra picorna-like virus  
OL569508 Corparats virus-2

KCS--NYHSGHNKYSANLIQVDFISSANEPLTPNAMTKLMGEEYAPVRVSLDDFFSTLEFE 1232  
EP---QKS--DKS-----ST-----KVARKLMGT 1449  
PRDYSTDFDNRKN-----EKEKKRTFGQPK-----TVKDYDIDYEN 1673  
---A-QADEKG-----MRV---ET-----CLLWQKRLNPE 1447  
KT---GDIS-----DDDK 1368  
KK---YSDDD-----RTP---QN 1428  
RR---FESDD-----RKREITQN 1165  
---VVHSDDD-----S-----PVRQLKIVIG 1299  
STEEVSRAE-VKQ-----LAS-----LIDCKRQG 1190  
T---KSKID-NKS-----MAGLRREVR-----RRRYARSKRAQ 1187  
SD---ADNGKQ-----MKQ---L-----LDEFLTRQGS 1056  
KNGNDTDIEKEKH-----ISGPI--SL-----TQRYQLKLQSS 1499

DQ286292 Rosy apple aphid virus  
OP265432 Penaeus vannamei solinivirus  
MZ210029 Fushun monoleptalauta Solinvi-like virus 1  
KX024775 Nylanderia fulva virus 1  
KY070327 Diabrotica virgifera virgifera virus 2  
Q540582 Apis mellifera solinivirus-1  
MN918666 Picornavirales [unknown host]  
MW251313 Icha Creek insect virus  
MZ822083 Apis picorna-like virus-4  
FJ528584 Solenopsis invicta virus-3  
MW314636 Myrmica rubra picorna-like virus  
OL569508 Corparats virus-2

ERKRVDYINQARDANDKTFYRLCKRYPGLENCIMKVHANMLTDADMI-----VNDTDL 1288  
---ILEEDEVPSQSLYDFEVT-----SRNPES-VDTTI-----RL 1481  
---RRKQSVLALPDMNAWSMFD-----STQD-VISR-SHKNLAM-LCMFPKGMYEADSL 1722  
---LQDQSVNNQEPMSRFDNTR-----LSNNVIYPV-IHRLCH-VYMSN-----SDL 1490  
---KQKQTVNMKMDMNSYDAFK-----AHIDACRKQ-ALKAMVQ-IYVLP-----DDG 1411  
---CQNEDEVTLCDMNDFTPYK-----LYMQNAYLR-ARTNMLQ-VTVVY-----DDR 1471  
---STKEDVLKLRDMNDHTSFL-----PIMENAFKR-ARKNLQ-MYCSN-----STA 1208  
---PEREDVLTLTDMNGFDSYV-----PIIKNSWTK-TRKNMTM-AK 1342  
---LEKQDVLTLCDMNDYDAYK-----KYIENAYTK-ATKNLAQ-VYMA-SDV 1233  
---LEKQEVTLTCDMNGFEGGK-----PYFQIAEEK-ARKNLQ-VYMA-NNE 1230  
---IQRDQVTLTDMNSYDAYK-----PYIDVAVTK-ARKNMTQ-LYFVH-----SQE 1099  
---KRKQYIKDLENMNNYDSYM-----PYCENAHNK-VTKNLVQ-VYIND-----AKE 1542

DQ286292 Rosy apple aphid virus  
OP265432 Penaeus vannamei solinivirus  
MZ210029 Fushun monoleptalauta Solinvi-like virus 1  
KX024775 Nylanderia fulva virus 1  
KY070327 Diabrotica virgifera virgifera virus 2  
Q540582 Apis mellifera solinivirus-1  
MN918666 Picornavirales [unknown host]  
MW251313 Icha Creek insect virus  
MZ822083 Apis picorna-like virus-4  
FJ528584 Solenopsis invicta virus-3  
MW314636 Myrmica rubra picorna-like virus  
OL569508 Corparats virus-2

EILHKKLNKAYVQISYAGFRAYALHVGEKFLSVAHCFDGVGK---SLVLSD---GK- 1340  
AENYVKV-----KGFSGNFGIILGNGFILTTLTHTVFMNTI---DSLIEIDSDTLF--- 1528  
KINPSTV-----SGFLSVYALFVAENYFVTVNHALQN---NYNIFVA-EDFGVAD 1768  
GDTTQED-----LKAVNYGIFVKSRLLITVAHSFDEKHD---WYWVGCDDELGEK- 1537  
EILHYEP-----RGNQSCYGLIVGDDMLVTVGHVVDSVEERPGSSVYACCDPEEEA 1463  
DIIDFEP-----IGKQSCYGLFLTGTMTFATVGHSVFA---AGNLVYACSDSFDKA- 1517  
QILQREP-----DYNCCYGLFLGKNMLVTVGHLVDV---DMGVYVGHDDLEGF- 1253  
DILTKPE-----AGKQACYGMINDKLMVTVGHYETWKQ-SGMSLHMGADLNNK- 1392  
PVMNVEP-----IGQMCYALFLRGNMFEVTVGHIADNTSG-WHLLVVGCDSPFGK- 1282  
NCIASKF-----SDHIVCYGLFVFKRLASVGHIVEALKCAPGYNLYAGCDQFNGK- 1281  
SKLYSEP-----IGQACYGLFIRKNNLLVTVGHVARDTKRMPAYNLVVGCDSPNGV- 1150  
DIINYEP-----KDLANYAVFIKKNLLVTVGHLVDQMKLYIGCRLYVGCDQFKGK- 1593

:. : . : . \*

DQ286292 Rosy apple aphid virus  
OP265432 Penaeus vannamei solinivirus  
MZ210029 Fushun monoleptalauta Solinvi-like virus 1  
KX024775 Nylanderia fulva virus 1  
KY070327 Diabrotica virgifera virgifera virus 2  
Q540582 Apis mellifera solinivirus-1  
MN918666 Picornavirales [unknown host]  
MW251313 Icha Creek insect virus  
MZ822083 Apis picorna-like virus-4  
FJ528584 Solenopsis invicta virus-3  
MW314636 Myrmica rubra picorna-like virus  
OL569508 Corparats virus-2

---NYPGVVVSITR---ERDLSIIYCKELS--NL--KSARSAFVKDS--SDL----- 1380  
---SAPATIHTTWE---GSDLALLKCPKATG---KALLKHWWTNDIDIKLYEGAMISP 1577  
NVITLYPVKVHQENA-LKDVAFCSCT--MPKSF--KNITSNFISRKIHEDLA----- 1815  
---KYKVKLTNKFVGTNRDLAMCEIISSKAPQF--SDITKHFPSPRAEMGRW----- 1583  
GSFKSVRLSLIHRYP--SPDISVWYLNPKL-ANYKQPSLRKRFVYRKKIYDE----- 1512  
---HCHILLYKYE--YRDLISWYIPSLK-KKFCASKIRKHFLSQYVYDD----- 1561  
---HCTLLLLKYP--PRDISVYVPSVR-YAF--PDISKHFLPRHVYSEQ----- 1295  
---FYKMRPVQYK--HDISVWTPIPKESLPF--KSANLFLPKRKEVYVQW----- 1436  
---FYRCKLLKTYK--SPDLSFWSCD--IKQSF--PDITKFLFLTRKQMDY----- 1324  
---LYKMNLVVRNRY--KRELSVWDVD--CPNDF--VDLTSFFPIKKEELYDA----- 1323  
---FYKAVCRNVFK--ARDLSAWTVE-GIP-DF--PDISNLFVKKKEIYEMT----- 1193  
---FYKARLLRNK--LRLSVWVEVE-RCPFDF--PDISNLFSSRDEIRDG----- 1636

:. :

:

DQ286292 Rosy apple aphid virus  
OP265432 Penaeus vannamei solinivirus  
MZ210029 Fushun monoleptalauta Solinvi-like virus 1  
KX024775 Nylanderia fulva virus 1  
KY070327 Diabrotica virgifera virgifera virus 2  
Q540582 Apis mellifera solinivirus-1  
MN918666 Picornavirales [unknown host]  
MW251313 Icha Creek insect virus  
MZ822083 Apis picorna-like virus-4  
FJ528584 Solenopsis invicta virus-3  
MW314636 Myrmica rubra picorna-like virus  
OL569508 Corparats virus-2

---TLGGYFMR---CGPSVTIVAGNIEYREYQEFIDGSCSNSEYRPSM----- 1422  
NSSRGVDTFNGRFILEPQ-----KR---RLGQ---YH 1603  
--SRKHETAFAR--YAK-----NKQLETSLGVE--FFIRKTDISYFDGSEVEE 1857  
-T-TRSFHVQFFRYFGVPEAL-----NKVTVQQAHVQ--KMTAHFNNTSVKTSRV 1631  
-T-VISAVLER--FGT-----NKQREYHCGDLN--FFTGPD--ACGKG--T 1548  
-I-TANAVIQR--FGP-----NKTEEFHSGECT--MFRTPF--YFGKNSKK 1599  
-N-VWDSVIQR--FAP-----GKKEEFQSSTFE--YVCGPT--PFGSGSTT 1333  
-H-ELSAFFQR--FGS-----NKKEEFARGPLA--IQTDPT--SDGFG-GV 1473  
-Q-MVNAVIGR--YAP-----NKEKIWIQGCCD--IVQPYF--STGS--GG 1360  
-E-NCNTVIGR--FGM-----NKREVLVYGNCE--FIQEPF--KVDN--KG 1359  
-E-GVNTALQR--FGP-----NKEEIWVQGSAAE--MISEYY--QLDK--DG 1229  
-Y-MINSVICR--YGP-----NKEKIWLLGME--FVKPFM--PLTE--GG 1672

#### Protease domain

DQ286292 Rosy apple aphid virus  
OP265432 Penaeus vannamei solinivirus  
MZ210029 Fushun monoleptalauta Solinvi-like virus 1  
KX024775 Nylanderia fulva virus 1  
KY070327 Diabrotica virgifera virgifera virus 2  
Q540582 Apis mellifera solinivirus-1  
MN918666 Picornavirales [unknown host]  
MW251313 Icha Creek insect virus  
MZ822083 Apis picorna-like virus-4  
FJ528584 Solenopsis invicta virus-3  
MW314636 Myrmica rubra picorna-like virus  
OL569508 Corparats virus-2

---EVKLKRVGLVVTETIKKGDCGFFVARIHG---TMRIIGHNAYKTHT---VVFSGFI 1475  
DERTVSDFVRSQ-IVT-RAGDCGSAYISTQKD--VFGHIFALHACLQNGR---SHGAYI 1656  
AKDAFAETITFNGSKTPRSTAGDCGLPHYLVTGKLDYSNKLILGHFAGTGTGHTSQMNSSLI 1917  
KADYA-MAMVEGNHAYTSFGDCGLPYFAISSQ--FQNKCVGIHCGMSGVQGTSPKGMASMV 1688  
LSDYGYQLEYGTFGIKLITVYGDGCLPYACEPQA-CEQKILGIHCGMNGEYTSQGVVATI 1607  
MGDYAQLSFGTSNKLITLTFGDCGLPYFCEQDPKYHDKIIGIHCMNQGLGYTSLGISCM 1659  
LRDWAGCYFASTGIKVTAGDCGLPYYSIENHPILKDKIFGIHCGMNGEYTSQSAVAVI 1393  
ISDFGMSFGTFTGKATTYGDCGLPYFAEPH--FNDFILGIHCGMNGEYNTTSIAALL 1531  
ISEFGYVDFATIGIQITLYYGDGCLPYVAEKDF-AHDKILGLHGMNVDGYSSVGVIALI 1419  
AQEFGYIDWATVDITLTTGDCGLPYICERKK-FHNKIMGLHFAGNVNHKTIGMSALI 1418  
IQEFGYVDFATFDLMLTNAAGDCGLPYPAETRR-LHNRLILGIHCGMNGVYNTSIGIMALI 1288  
IEQAGIMDFGIFGTPLITTYGDCGLPHLSIDKC--HQNKIIGIHCMSGTEAHPISIGVSSLI 1730

\*\*\*\*

.. : \*

:

DQ286292 Rosy apple aphid virus  
OP265432 Penaeus vannamei solinivirus  
MZ210029 Fushun monoleptalauta Solinvi-like virus 1  
KX024775 Nylanderia fulva virus 1  
KY070327 Diabrotica virgifera virgifera virus 2  
OQ540582 Apis mellifera solinivirus-1  
MN918666 Picornavirales [unknown host]  
MW251313 Icha Creek insect virus  
MZ822083 Apis picorna-like virus-4  
FJ528584 Solenopsis invicta virus-3  
MW314636 Myrmica rubra picorna-like virus  
OL569508 Corparats virus-2

-----SQ-----PLIDELCSVVVPNADV----- 1493  
GREDLQDAMQSTPR-----RIPQSCPTPAEGV----- 1683  
FKEELEEWIEGLSKKK-----NSNEPVECPGCKVVKSGDLVSLPL 1957  
FLEDPEGLKNQSWG-----D-----IGVTESDSTCNICDNTS----- 1721  
FEEDYAVWLKQKET-----FLEKAAQQSQCCKMA-TKKWQLLP----- 1643  
FKEDVVDWEALYQKVRSSQVSSQSWNNPIVRAEADGEGPGKSPCCFED-VKITITKA----- 1714  
TKEDITDWRRLGQ-----KEIIMGENACCKFH-VDPRTEKP----- 1429  
YEEDIRAWSKINLK-----E-ERKVCDDFAADDTYIQUIP----- 1564  
MQEDFDALD-----R-----QTACDFCSVTKTRLAP----- 1445  
YKEDLVVWKGAEKQ-----SKCKFCDDVDIIIAQPPID 1451  
YLEDIQWQSQFCQDV-----ISCRHCGETNVMISP----- 1319  
WKEDIVEWMGDISKPL-----NKQG-SLQEPDCFQCDLPVIKRAKVS 1772

DQ286292 Rosy apple aphid virus  
OP265432 Penaeus vannamei solinivirus  
MZ210029 Fushun monoleptalauta Solinvi-like virus 1  
KX024775 Nylanderia fulva virus 1  
KY070327 Diabrotica virgifera virgifera virus 2  
OQ540582 Apis mellifera solinivirus-1  
MN918666 Picornavirales [unknown host]  
MW251313 Icha Creek insect virus  
MZ822083 Apis picorna-like virus-4  
FJ528584 Solenopsis invicta virus-3  
MW314636 Myrmica rubra picorna-like virus  
OL569508 Corparats virus-2

---PS---TAVVV-----KVPIVERDYG-----SGYVEMSPM 1520  
-----SHI-----EINGHEMLGTT---SQVD 1701  
PEKEVCENHTIRWDEDDHNSFTCSRHLLTFLK---DTFSGSCEMNHGHEVPHSVHHPHTH 2014  
--VTQDCGNIIWDSLHTFPKMSWQNHVRSYLRMFNSTHAVVFTYNNGTLWGSVKHQHTK 1779  
DTTTPKGDGHVTLWNSTHSTRGSFANEFAYLITLQNKQGRYIKNSG-KLHGSIEHSHLQ 1702  
FKDKPKCEGHEIWHHMHLSSTISTFVDEVMTFANQRQLRGVIKNSG-KLYGTVEHSHTQ 1773  
DDHPKAKGHVNVHSEHTSTWMTFSEEIKELYLTKHPRYEGGILKNSG-IMYGTIEHSHTQ 1488  
-TVKKCPDQFNVFSSQHNSSNRTFSEELAAGLEFQPGFNGVILKNSGQIAYGSVKHSHQ 1623  
ASIPKCDNHEIVWNGNHNESNAKAFVELKFHDELRTSFTGMVINKSGPTLLRGVSVSHSTQ 1505  
KEKYKGNHEIVWNSLHESSTPTLNEELEHYLNIFFKFTGTITIKHSGDKFYGSVSHSTQ 1511  
SLTKPCDTHLAIWSPVHSSPATFSEELNGYFKLRGNFTGTQIKNSGPRFYGSVEHSHTQ 1379  
KSQDKNKKHEVLEFGVDHSSPATFYREIKQFLDVNKTFTGTVLKNTGNKLGGSVEHSHTQ 1832

DQ286292 Rosy apple aphid virus  
OP265432 Penaeus vannamei solinivirus  
MZ210029 Fushun monoleptalauta Solinvi-like virus 1  
KX024775 Nylanderia fulva virus 1  
KY070327 Diabrotica virgifera virgifera virus 2  
OQ540582 Apis mellifera solinivirus-1  
MN918666 Picornavirales [unknown host]  
MW251313 Icha Creek insect virus  
MZ822083 Apis picorna-like virus-4  
FJ528584 Solenopsis invicta virus-3  
MW314636 Myrmica rubra picorna-like virus  
OL569508 Corparats virus-2

EYAQEFKKC---VTDDPYMPR-----NSGL----- 1542  
FLVPQKFGST---DAPRMPL--PKDAIELGRLAKTPPETTKSRKIPITQPMQMT--- 1750  
CMPFYFKPEYKYAQNSSRWVK-HPTGEYSYWIYA-----QTTATISAIQNKYLYK 2063  
FYADHTRWM---DDTKEGV---YPAHEVGLDHRTKD---ETTVMKFNVSMAITLQEFLLR 1829  
FIPNTYTHDL---EV-PHDWLL-TTAGELEIANGME-SSQKLSMKTATITGNFADHLLR 1755  
FLPNQRLELV---TS-PHGWL-I-KSTTDMGIDRLP---NTKVFVRTSALFFASFASHFSR 1824  
FLPEQDPST---NHDVSPWKV-VDAKDWDWRGTG---QCELITVEIGGSSSLTKYLK 1540  
FLPDETT-S---FNKEPGFKGSMTFGEYGEDSSHIPPNTKVVINKNIELVNMPSFTK- 1677  
FLSGMRDET---FVVTRGWVT-TTASELGFDSPRINPNSTFSYRVVDVSYGGYLCILN- 1559  
FIS-KFKTE---LVTINGWKL-STAGDCQFESNHISPTETVMYRVVDVQFNSIFKAFK- 1564  
FLHNVFVRDN---VKVTNGWRT-STAEDLDMHGRIDAGETISYCVKDVFPFAIYNMFN- 1433  
FIFNEFE-N---LKISNGWKT-ATASEIGFNKLHVSFKETVSYVVDQCIIESIYSTFN- 1885

DQ286292 Rosy apple aphid virus  
OP265432 Penaeus vannamei solinivirus  
MZ210029 Fushun monoleptalauta Solinvi-like virus 1  
KX024775 Nylanderia fulva virus 1  
KY070327 Diabrotica virgifera virgifera virus 2  
OQ540582 Apis mellifera solinivirus-1  
MN918666 Picornavirales [unknown host]  
MW251313 Icha Creek insect virus  
MZ822083 Apis picorna-like virus-4  
FJ528584 Solenopsis invicta virus-3  
MW314636 Myrmica rubra picorna-like virus  
OL569508 Corparats virus-2

---TSIGFNLFKNYN---RMKEKH-----YT-----HELQLE--- 1569  
----- 1750  
LHSTKQILRSSPTRNKKTGEIQKMRREYFLIAYPDSKNGY---MELKEP 2110  
-NDTIIIGFRFDGFV---RLRNDNILITTDIYVHYETNFNQSCDI----- 1870  
NKYWGDDFCNFNVT---DIKSLPMVKYCIITTH-----INKFDPKSQPE 1798  
LTDLGNDFRIKGCYIN---EPVTKRLMFRFTLVLFDVSVQ-KRCEIITALNTIQCINES 1880  
YWERSSDFRIRAYRYK---HFKTNAFVIRMTIIVPYDKDYK-Q-EIADF---FIETEQP 1591  
-KIKTSNFRILNCLSS---GEKMMKFIEI-IEFPV-----TKLESYK- 1715  
NIGYASNFRIYANVYN---KG-HKRAALIK-IIIPMEVPS-----RESQFSLSK- 1604  
SQPYIKNFRIIANVYE---KDGKQRTVILT-IIFVSDFNVK-----QQTVR- 1606  
AISFAKNFRINIDVFI---NKENKRRALIS-LFVPADEAQK-K-QIIEYGPLLNFR- 1484  
VVPHVKDFRIRINIYI---TESLKRRATIG-LYILHNSKLP-Q-----TELDLTK- 1930

DQ286292 Rosy apple aphid virus  
OP265432 Penaeus vannamei solinivirus  
MZ210029 Fushun monoleptalauta Solinvi-like virus 1  
KX024775 Nylanderia fulva virus 1  
KY070327 Diabrotica virgifera virgifera virus 2  
OQ540582 Apis mellifera solinivirus-1  
MN918666 Picornavirales [unknown host]  
MW251313 Icha Creek insect virus  
MZ822083 Apis picorna-like virus-4  
FJ528584 Solenopsis invicta virus-3  
MW314636 Myrmica rubra picorna-like virus  
OL569508 Corparats virus-2

-----NE----- 1571  
-----CSKVPVSTDLRYVLE----- 1765  
QIGMKDRILTVKQKVVVPPCVENIEILEEPIQ-NIDNGIPWDIPFQE---GGKVSMTGS 2166  
-----FSKVNLPBGDSGYILTELMPIYRGAQI-NFLNGKLNDDPFDQIKDNETVKVFGT 1923  
QIY---MSALPELPFGNQVYASEVKDIITTSLM-EKQGVSEDMPIYKLVSSNETVRVIGV 1855  
N-E-DTFAIEPPFPGPVYVSQAVKEIIDTATL-TRRGHPEDVPYENVDKNETVRVLGS 1936  
N-D-TYVFTSNFAGPVYVPLEVNQVLQATIR-NRERKLEDPVFARVPNETVRVLGA 1647  
-R-RYVFHQFNDRKEAYVCEELKEILVEAKANLENQKLEDPFVQDENNDTINIVIGV 1771  
-Q-AIVPLININDEQVVHVNGDIFDVMNQHM-Q-RLRRGMLPDIAIEDIPDNETVQVIGV 1659  
-Q-AIVPLINNEDEEVYVTEVDSDIFKTAIK-RKQRGILPDVPYETVEN-ETVEILGI 1660  
-Q-GNIPHLPISETEEVYVSGDISDIANQYIA-RKRRGFTLPDIPFKEIKNNMTSVTGI 1539  
-Q-GMIPGLTDDQETACDDIKTITGIYQK-RYQREGFPDIPYKMDNSNVQIVGI 1985

DQ286292 Rosy apple aphid virus  
OP265432 Penaeus vannamei solinivirus  
MZ210029 Fushun monoleptalauta Solinvi-like virus 1  
KX024775 Nylanderia fulva virus 1  
KY070327 Diabrotica virgifera virgifera virus 2  
OQ540582 Apis mellifera solinivirus-1  
MN918666 Picornavirales [unknown host]  
MW251313 Icha Creek insect virus  
MZ822083 Apis picorna-like virus-4  
FJ528584 Solenopsis invicta virus-3  
MW314636 Myrmica rubra picorna-like virus  
OL569508 Corparats virus-2

-----N-----TCLPAAFSNRY---VTDTSSELVNGYGQP 1598  
-----FDQMAKELNGKP 1777  
FRYNQSHTPKNDYKRIGLST---NLPI---EKVPFDDDEKAPPDQYEKLITDNFGKK 2218  
FNRFTSHVPKSPFYQTPWFDDLKSDGKPLLPKLPENDITLLTDEQIASLSTDDRDGNP 1983  
FRGDKHKPNTFKMTTFFAKHIDKAFKL---EHKKFPSTDMKNIPEDLEKIVMDLNGEK 1912  
FHQSQSHTPKDHYLSPFSSIVKDLPI---EKRCIYELGKIPQIQDTLARNNYDL 1992  
FSQSQSHVNNHYQLSPFSPIVKDIPI---EKKPCVYDMSLVDPQEKIEVMVKNYGEK 1703  
LPYNASRPPGDQSLVSPYSSLSKIPI---TKVPFNKNSLAPAEQKEKMAINTWGLL 1827  
AHRNMSPLPPNSYMPPTPFHMAVGDTLGA---YKLPVRFDANNAPQEVKDRMFCRCGNP 1715  
THRNMTEPPAQMKPTTFFYKLALKFNLD---HKLNVNEMKDCPCQKQDMMDVRLGQP 1716  
AHRNMSQPNNAVYKVTPTFNRLQN-IQP---YKVPVRFDSNAPQEVRTDLALDRAGFP 1594  
AHRNMSPLPDGKFPYTPFSLRLEDETSF---HKYPARFDGENAPESKQKMDCLFGRP 2041



DQ286292 Rosy apple aphid virus  
OP265432 Penaeus vannamei solinivirus  
MZ210029 Fushun monoleptalauta Solinvi-like virus 1  
KX024775 Nylanderia fulva virus 1  
KY070327 Diabrotica virgifera virgifera virus 2  
OQ540582 Apis mellifera solinivirus-1  
MN918666 Picornavirales [unknown host]  
MW251313 Icha Creek insect virus  
MZ822083 Apis picorna-like virus-4  
FJ528584 Solenopsis invicta virus-3  
MW314636 Myrmica rubra picorna-like virus  
OL569508 Corparats virus-2

DPLWTQACKYGRNKNYDKHIFRHAVEMAL-----DYNRMTCYADKPKFKLTFEALN 1651  
SHLATQIAKHG---MTPPLSIDEGCLRRATSLVAYRYVSAMAKNG--RQLSTLSLQQTFFG 1832  
SARATQSIQWDDGFRDVPAAALR-----THVTEQVAYGMHEVY--AGLRVLSDHEVLH 2268  
SARVTQALQWAHLLHEPDINFF-----DEVSQEFMKYVNLIIY--GKMSLLTDEQVLQ 2033  
SGLATQSIQWAHNNHNPGLNLF-----KEITNEFQSKVLQYY--SNMDEMTQDEVLE 1962  
CQRRTQALQWAHPNYVIDEELG-----KVIDDEFQSKTLRY--SGRLRLSDEEVLE 2042  
CQRRTLSVAAHAKIGGER-HFT-----AEVGRFQKKIMQYY--SGTLTLDDEQVLE 1752  
CPRRTQALQWAHAKHYPASDIR-----NYVKEQMYSKAKAYY--ADMKVCNDEFVFK 1877  
DPRITQSIWAHNPFPDIELR-----KPVKSEYMANILESY--SGMNLITDHLQFLH 1765  
FJ528584 Solenopsis invicta virus-3  
SARITAAKNAHPITSPIDLR-----KYVLNQFRSNILEYY--ANLNLLTDKQVLS 1644  
DALITQARRWAHRIVAPNPYLR-----SFAKSEYRSNLAHY--SNMSLLTDHQLH 2091

\*

DQ286292 Rosy apple aphid virus  
OP265432 Penaeus vannamei solinivirus  
MZ210029 Fushun monoleptalauta Solinvi-like virus 1  
KX024775 Nylanderia fulva virus 1  
KY070327 Diabrotica virgifera virgifera virus 2  
OQ540582 Apis mellifera solinivirus-1  
MN918666 Picornavirales [unknown host]  
MW251313 Icha Creek insect virus  
MZ822083 Apis picorna-like virus-4  
FJ528584 Solenopsis invicta virus-3  
MW314636 Myrmica rubra picorna-like virus  
OL569508 Corparats virus-2

GRTE-----PFLSNVDISTSAGPYAKYFHNITKREILDTELADGKPIYRFSQNRAGQ 1704  
GIKA-----KGVKVLTKLNTDTSAGFLSLYLNAKAPLDAVKV---HDDGQVE-----PTE 1880  
GTGD-----GGLERLNLDSIGWTMSSLYEVKKKSDVLSV---DNLGKSVWVDFPAGR 2318  
GFPPKKH---PYVDCLGSLQINASIGWSMKALFNVKRNDIFTK---DNLGLITLNNNDAAK 2088  
GCSLTARPKDAPYFCGMALDQSVGFTMKELFYVQKRSIDLTV---DELBGHYKWLNEAAH 2019  
GLPK---SDPDHDYFKGMELDSSIGFTMKNLKYVMKRSVDVHC---DENGXYTWNPPASA 2097  
GIRY---PDDPAQFFKGMEINTSIGFTMRQLFYVTKKSDVIGC---KEDGTYFWQHNAAD 1807  
GYPITH---RFRKGKMLELDSSIGFSLKSLFCVNRKSDVITC---NESGBYFWKNDNEASL 1932  
YSGSGH---LRRGGLQPLEIDSSIGWTLKQIFNVTHKSDVILH---SDKGYSWKNDNECAD 1820  
GYGNH---RLYGALGMEIDSSIGWTKELRYVTKKSDVINL---DSNGNYSPLNNEAAQ 1821  
GYENKH---RLRNLGLQGMELDSSIGFTMKQLYTVQKSDVIDL---SATGEYSWADNEASE 1699  
GYQSTH---SLGRGLDGLTDSACGWTLKQLYTVNKKSDLISV---DMKGNAYWEDNEAAQ 2146

\*

**RNA-dependent RNA polymerase (RdRp) from the positive-sense  
single-stranded RNA [(+)ssRNA] AmSV1: 2103-2418**

DQ286292 Rosy apple aphid virus  
OP265432 Penaeus vannamei solinivirus  
MZ210029 Fushun monoleptalauta Solinvi-like virus 1  
KX024775 Nylanderia fulva virus 1  
KY070327 Diabrotica virgifera virgifera virus 2  
OQ540582 Apis mellifera solinivirus-1  
MN918666 Picornavirales [unknown host]  
MW251313 Icha Creek insect virus  
MZ822083 Apis picorna-like virus-4  
FJ528584 Solenopsis invicta virus-3  
MW314636 Myrmica rubra picorna-like virus  
OL569508 Corparats virus-2

CIRNHLKTKQNLNLTATYIPCLISQDN----AKVENIEKEKAQKGVRLFNVDPAVNA 1759  
LGIKTFQDANNILA-RGKDYPNATLLSIGHCKLKSSELLPAQKIEQGGLRFCVAGIESII 1939  
FAKQFYQEGVELIK-NGIRPWSVFLEM-----MKMEKLLKAKQY--IGRIFCSEDIHGV 2370  
NPRITQSLKNAHKKDYSPDYELR-----KYVKEQYMCNIMEYY--AGCNLLTEQQLIK 1766  
WLREQFQALASVYA-RGEQYFIAFLEL-----LKMEKLLKSKRF--VGRFTFLAQDILGVL 2071  
YLKQEQYQALDLSG-QGKNYVYVAYLEL-----LKMEKLLKSKRIY--TGRTFVVQDITLGLV 2149  
YLKQRFQEAQVLAS-EGKRYVSIFTEM-----LKMEKLLKTKIF--RGRTFVAQDVLGVL 1859  
YTQNLKFKEYKELSD-QGKDYTVCFNEL-----LKMEKLLPPHKNF--LGRFTFQVQDLIGVM 1984  
FYSKSNH---LRRGGLQPLEIDSSIGWTLKQIFNVTHKSDVILH---SDKGYSWKNDNECAD 1820  
YTQELLKISMEQAH-NGQRYTYAFNEL-----MKMEKLLKSKRF--VGRFTFLAQDILGVL 1873  
FLQEMYHDSKQVLS-DGKRPIAFNEL-----LKMEKLLKPEKQF--LPRFTFQDQLLGLV 1751  
YLKMYYYQAQELAK-QGKRYWSVFNEL-----LKAELKLLKEMW--LPRSFVADQLGLIL 2198

\*

\*\*

\*

\*

\*

\*

\*

\*

\*

\*

\*

\*

\*

\*

DQ286292 Rosy apple aphid virus  
OP265432 Penaeus vannamei solinivirus  
MZ210029 Fushun monoleptalauta Solinvi-like virus 1  
KX024775 Nylanderia fulva virus 1  
KY070327 Diabrotica virgifera virgifera virus 2  
OQ540582 Apis mellifera solinivirus-1  
MN918666 Picornavirales [unknown host]  
MW251313 Icha Creek insect virus  
MZ822083 Apis picorna-like virus-4  
FJ528584 Solenopsis invicta virus-3  
MW314636 Myrmica rubra picorna-like virus  
OL569508 Corparats virus-2

ILKIMFGDWFSRAMAKSSDGYAIGQNPYTTSTETIWHRFSTKQKILNTDFKAFDKLLIT 1819  
PCRSKLGFSFVAMQNELRHDLFFCIGIDFTESSYLLHRLLSVNDTIQGGDFKRFDKTMPI 1999  
WGRKFMGDVFRRA---TLYDDGIGVGVDSNADFRIYHK-LVEKGLYTGDSYRKTPTVL 2427  
LERYVMGYFSAKA---MRDDDYCAVGIDPYANFHDMEVE-LRRFDHVAIDYKRFDKTIPG 2197  
LERYMGEFAIRA---MRDDPNCGVGVDAHDKFNRYVNY-LNHFTQWADYKRFDRITPG 2128  
MERRILGMIAVRA---MKDDITCGVGTDPFKNFHQYYLQ-LSQFQNIWAGDYKRFDRITEPA 2206  
MERRILGGMCIATA---YKDDPNCGIGCDPAVDNFRFFIR-MNKFSLNLAGDYKRFDRITPG 1916  
MERRNLGEFSARA---MILDPTCGVGTNAYSDFKIKYLR-LRKHNFLETDGYKRFDRITVEM 2041  
MERKILGEFTARA---MLWDKTCGVGINVYSDFDQLTRE-MSKFNQFTIDYSYKRFDRITPA 1929  
MERWILGEFTARA---LAWDENCAVGCNYPATFHKFATK-PFKFKNFSCDYKRFDRITIPK 1930  
LERNVLGEFTARA---MLWDKNCGVGINPYTFEDKLFYR-LSQHFNPFVTDGYKRFDRITIPV 1808  
MQRVILGEFCARA---KLNDPNVGINPYTQFDKHANY-LMKHFNMFDTGYKRFDRITIP 2255

;

;

;

;

;

;

;

;

;

;

;

;

;

;

;

;

;

;

;

;

;

DQ286292 Rosy apple aphid virus  
OP265432 Penaeus vannamei solinivirus  
MZ210029 Fushun monoleptalauta Solinvi-like virus 1  
KX024775 Nylanderia fulva virus 1  
KY070327 Diabrotica virgifera virgifera virus 2  
OQ540582 Apis mellifera solinivirus-1  
MN918666 Picornavirales [unknown host]  
MW251313 Icha Creek insect virus  
MZ822083 Apis picorna-like virus-4  
FJ528584 Solenopsis invicta virus-3  
MW314636 Myrmica rubra picorna-like virus  
OL569508 Corparats virus-2

ELIEAFICYG-GLSTFKNEKNPHSELMYEAISLTLIHAVHILNGSVYVNVNNGNESGTFVT 1878  
ELKRAACEVVEKCYMKNPLNRYDAPARRVLYNTWCSPLYLARDLLMTTGNQPSGNAMTA 2059  
WLYRIACDVLTKL-----NPHLEKEIRITVDMSSTIKHVSGRSMFYVSGGMPSGSFWTA 2481  
FLIDLVDCLIGV-----NKKMEKPLKSMKKSFHRIRIQSIGNSLFETIGGMPSGSFITA 2251  
CVFQVQVDMVLVKH-----NPKIGQIYSVFNSLIYRFQITGRITLSQVYGGMPSGCGLTA 2182  
DVFLRISKLLQKA-----NPHMAQIKSAFNAIVYRFQVSGTTLAHVQGGMPSGCGLTA 2260  
LVMLEVMQCLKRA-----NPHMANDIDSCMRNTIERLQVSGTTFEYVFGGLSGSCFSTA 1970  
VAFEDMKILVRV-----NPYIQNQITSTIKAIYNRIVSVSGSVTAAGVGMPSGCVITA 2095  
CVFEDICELLIGA-----NPHLKHHLNLSCKFTLVNRVQVSGNTIALVKGMPSGCIPITA 1983  
CVFEDFDMILQIA-----NPHMKNEIYACFQTIIDRIQVSGNSILLVHGGMPSGCVPITA 1984  
SVFDDIRDLLIEA-----NPHIKNEITSTFNSISKRIQISGTALTCTIGGMPSGCVPITA 1862  
CAFDDIRDLLIEA-----NPHMANEIQVCIDCISRFQIAANTLSVYVGGMPSGCGLTA 2309

\*

\*\*

\*

\*

\*

\*

\*

\*

\*

\*

\*

\*

\*

\*

DQ286292 Rosy apple aphid virus  
OP265432 Penaeus vannamei solinivirus  
MZ210029 Fushun monoleptalauta Solinvi-like virus 1  
KX024775 Nylanderia fulva virus 1  
KY070327 Diabrotica virgifera virgifera virus 2  
OQ540582 Apis mellifera solinivirus-1  
MN918666 Picornavirales [unknown host]  
MW251313 Icha Creek insect virus  
MZ822083 Apis picorna-like virus-4  
FJ528584 Solenopsis invicta virus-3  
MW314636 Myrmica rubra picorna-like virus  
OL569508 Corparats virus-2

LLNCVSVHIIFNYSFIV-C-WNKVPDYIHIKPLMKDIMSRSELAILEDKTKQVVSKDIFM 1936  
TLNSIVSEIATYTCLEFRA-----D---EHNLRINTGDFMTIYIGDDVVAATKTMLMP 2109  
PMNSFINRCLIIYTVYCVLFAEKFG--C---FPDWDQFTITNYYVMAYGDDIVAVATPE-RN 2535  
PLNSVFNLLITFAAFVYIL-KLHG-I---DATWEDFQRLVVCRFYGGDDGVYSVHESIAK 2305  
PLNSLVNDYIIFSCFASIC-SDNG-M---EWNWQLYDKNVRIRFYGGDDVYLSVSAKYS 2236  
PLNSIVNDYLLFSSYVALM-RKFN-L---AFSWEHYEANKVRFYGGDDVYLSVSDSELS 2314  
AFNSLNNEFLMYACFYLLG-QKFN--L---DCSWEDYEANIERLYYGGDDVLIASDAWRE 2024  
TGNCFTINEYLIYTCFVLLG-NVAQ--F---DVSWSKSYNHRVRFYGGDDVIVSCSDVAK 2149  
PLNSKNDYMIITAYISIC-WKNDRE---LATYARFVCLVHIFVYGGDDVIVTVSNEIKN 1918  
PLNSKNDYMIITAYISIC-WKNDRE---LATYARFVCLVHIFVYGGDDVIVTVSNEIKN 1918  
PLNSKNDYMIITAYISIC-WKNDRE---LATYARFVCLVHIFVYGGDDVIVTVSNEIKN 1918

\*

\*\*

\*

\*

\*

\*

\*

\*

\*

\*

\*

\*

-- EEDDLIDLAASLGMECTKAK - G -- GLDDGQCNFCNSRVLVNDEVS-EQ-IVYPRLK 1986  
 -- NADKLISYMSEIGLTLTSPKIDPEKDFPIEMEESRSTFHEHTS -- LVVLARLK 2166  
 FFTQE-AAARIINIIRGLGVMSKDGKGNLVDPEFPMNKLISWISRYFPLQGN-YP-VIVGALK 2592  
 FFRNVRILAKAVAHFLFGMNMSSANKDLKPDFTWETGNWISRYFPLFLNG-RS-VVLGALK 2363  
 VFTRETVASKLVLGIFVMVIDSVSDGGVDSDFTWETGNWISRYFKRLDR-YPHFVGALK 2295  
 IFTDRKISVLMVELEFGMVLDSAAKDGSVATFDNNETAWSISRFFRKIDQ-PP-FITGALK 2372  
 YFTDRBISILLITQFGMVLDSAAKDTSAKDTWESASWISRFFRKLRG-PP-ITCGALK 2082  
 FFDRIITLSQOMLETFGMVLDSQKDGTVVRVFTFEQASWISRYPFKLKH-YP-FFVGALK 2207  
 FFNSVTVARKAKQLFGMTTIPPSRKQIGLPDEPDQISIFSRFFRKLRD-YN-FYVGALK 2097  
 IFNCQTLISEEMKILFGLNMDDGSKSDIPKTEFTLISIFSRFFPLKHQEN-FYVGALK 2099  
 FFLNVLISLELTKLIFGMIMTSSDKSGEGLYFESNDEASWISRFFRKLDN-YP-FYVGALK 1976  
 FFLNVLISLSDLETKLIFGMEMTASSKEGKFFFTYDEASWISRFFRKADQ-PP-FYFGALK 2422

KSSIIGLLHYWFAASLDNRQVNDNLMIATLFEASLHEREFYDLSVLRDHMLVSWLEFGDITR T 2044  
KSSIEALLHYHCYSLTETAVQDNRITLQAFVSYDEEYNNLDHMQILVHAWGQVLPQY 2222  
KSSIANWLWHYCHETAIQIGSQSTALYAESLWKDFYFQIYADVKLGIKEFFQGVN - Y 2650  
KETILSYFFKTKLEPQHLSLLEKAAEEASWEGEEFYNNVEDLTRCIDCPPLKRL - H 2421  
KSSINSHFYVYVTSLDATHIASLLEAMAEALWDEEYNYNLTCEVRLAKMSPRLRA - H 2353  
KSSIGANFYHYVTSDDLHIGDMLTKALFEASFWDMEYQITLTARRAISKPKALG - H 2430  
KSSIEANFYHYVTSIDYSHGLSGLMTKAFYQEAASFQKYEYLLQISAIRKEICEPLRGR - F 2140  
KESIFAYFYHYVSETTPSHIGDLLTTAQFESALWDDDTFFEKVQEGIKFVLEKNPNILKHNY 2267  
KSSISTHFWHWDICSPKQGEQTLIAQLAESFWSESYFNINVOEQIRVAIRKVPKIR - Y 2155  
KSSIQTHFYXATDDTPEHFQGVFKTKIEEAAALWEEFYFNKQISYQTEIRKPFSEK - F 2157  
KSSINSHFCYVYSSLKPKHLEALFTVAWEAALWDEEYFNQINQETRIAIRKYKPNIGL - Y 2034  
KSIITHFOFHYLTSLSPHMGDDYITTLIEEAAALWDEEYFNKQIRCHVHAWGQVNNKDILN - H 2481

VAFITVNYQSGKKRLKSLMLMNDFFEYQQISALA-----DRKTKESDYSDDLIRLILKTAQLLES 2098  
 EM-AFSALLGKIINKTKIKREF-----KRATEKQSLRPKDPKRLDSSLC 2266  
 VVLQPYEAYHDDIFHNSAIAALFQLSLTLCQE-----SDFTNSV 2689  
 LALRTFNLTITQDKQNVKSL-ENQEHLEL 2449  
 LTLRDLRLVQHSIMKAALPKLCDROETT-----ENLN-NEDKVRVRP 2394  
 VRLIDRAVIGKEIIVFALPYSLG-S-RHQ-----QNLINWADVEVEREALTKQEV 2478  
 QDITLYETMIETDTHFNYSPLLTFFQKEI-----PKSTSWADEIETGEFQSAHYL 2190  
 FQYRSQHDIEREVVKMTTKS-----LHPEIATPEVPEIPIKDP-----NCLTK-S 2311  
 FCFRTREFLQQQTIFEGAYLSGGVKRRHQGINLVD-----SE 2189  
 FNESYKSIQKRYIM-----NGWNEFVKLEIKDLNLNLN 2190  
 FNFERSRLDIQSEIFSGSVMMNKVITHG-IDLSEINKIKATSEDDWNAKCAQDTQNTSNT 2093  
 FSPKSLRDIQEOFFYSALGTGLLIRNT-KDPT-DIPTGKSMHNDTLDVNDPEYSADQ 2538

```

D I Q K A I S D I T N F S V V K D R A L A I Q K - - - - - Y T T T S T P P - - 2131
- - - - - - - - - - - - - - - - - - - - - - - - - - - - - - - - - - - - - - - 2266
- - - - - N I I R S G A L D N R L N I I L K A I N S E K - Q S V N E - - - - - F - K 2719
- - - - - P G - - - - - G - - - - - Q - - - - - L Y P D L L R E Y Y L S K Q F - K 2470
- - - - - S V P R T Q D - - - - - - - - - - - E K Y P F - - - - - Q R Y - H Q K E Y Y E Q V T K P K 2231
E - - - - - A Q P I T Q E Q V T E D N L N A T R F G Q L T K D T Q N F - - - - - I D I E S N A Y K R R V I Q S L 2527
L - - - - - N - - - - - - - - - - - Y N F F - - - - - E K P L F T K T Y K R R I M M K A T 2214
I - - - - - I - - - - - D F G V V A G - - - - - S - - - - - Q - N F F - - - - - E R K H N S Y Y R H I I R F I K 2342
L - - - - - Y - - - - - E K R I V D K - - - - - - - - - - - T R E I L L R - - - - - Y T Q T E N E - Y K L F I E R I N 2221
- - - - - - - - - - - - - - - - - - - - - - - - - - - - - - - - - - - - - - - 2212
- - - - - - - - - - - - - - - - - - - - - - - - - - - - - - - - - - - - - - - 2212
- - - - - - - - - - - - - - - - - - - - - - - - - - - - - - - - - - - - - - - 2216
I - - - - - S - - - - - E H O I V P O L E K T O D - - - - - K N L Y D K I L R F N N R K F R K O G R R - - - - - Y S E L N S L T 2584

```

```

ITGSL-----VHESEMAPLTTNSNPISACLELISKLTAGTIEHFERTGPP 2177
-----PDLTLLNTGSHSTIPTCTQVIVDDPP 2178
-----MTA-----QPVYRNQNLDAKQLENL-AEKSFISLLNEAWQAGHTIKPLYDWF--QS 2167
ALRLAL-----NDQSFDDST-MEFSSVSLLNELEKQGTSPRPKYTR-LAPS 2515
S-KQSA-----MGS-NPKSYISQISQSGIITVLITWVMQ-ENAS 2461
TIYHNK-----LKD-LAMSYRKLNLLEKFKGEIGPVHISNK--R 2563
TSLDCE-----LNK-LGAYSQSKLNDLTSGSKISKPIIDVTSAGDP 2254
AYKGNDADELRLEQDKIWTQKQTNVDYR-MSHSNVGLKLNELFQSGRITKPNYSFE-- 2396
LILYKLR-----TDLITYINSEEY-KRMSFKSLHNLHFGVLRSPVDYE--A 2267
RIENEKAL-EGNFN-KESVNTVY-FKMSKAMHLEIFQGLISKLPAEYFY-N 2263
KLPEKVELE-EKY--MNRKSSYFK-IRKMSYIKLMEKFGQEVTKPELTFM--R 2164
RLPDFVAFS-AEAFASLINSLSNLLNLKSLSTOMINELFONGLISKSCPEYT--S 2637

```

H - NPTYSCTVITYA - G - RPDFGGEGPSKASSKTAAY - GA 2210  
QTSLPNPEPTANDLCAEESRVVHPVQVLLHPQNCESVHQVDSGKDNM - PGHAPA 2340  
G - TATNCLASAA - KTG - WCQSVKSSNATGVSQSSKGAEEKL 2808  
G - DISWETLHLT - FHEDNSTRPI - TVVGVRGTSSEKKGASFINA 2557  
A - SAKKAKLSFK - YTND - ERAPF - EFGYGVGNSKTAKEGAASFA 2502  
V - GDEWECEVST - KIA - NSEIF - IAWGRGNSKAEAEVAAASHAI 2603  
N - DKTWQCNICK - NLA - TCEDLL - TAVGQCKTKAKAEKEHASLYL 2294  
Q - KEFWHCTVTCC - YDS - -RRRI - CCEGRGNSKAEAKEGAASFA 2434  
I - GLDWSCKIEVL - LIS - SKRTL - TGIGVSKTIAKEFAEAMT 2307  
G - KMWDCNITFR - RSK - DLLPLF - TFSGSGTITKACAREGAEEA 2303  
F - LEUEWCEISK - DTG - KDRQY - NVSGQGNCKAVAREQAAAGI 2204  
I - OEKWICTITSV - ROS - DNNISI - KGIGKGVTKKAAEEAEERF 2677

DQ286292 Rosy apple aphid virus  
OP265432 Penaeus vannamei solinivirus  
MZ210029 Fushun monoleptalauta Solinvi-like virus 1  
KX024775 Nylanderia fulva virus 1  
KY070327 Diabrotica virgifera virgifera virus 2  
OQ540582 Apis mellifera solinivirus-1  
MN918666 Picornavirales [unknown host]  
MW251313 Icha Creek insect virus  
MZ822083 Apis picorna-like virus-4  
FJ528584 Solenopsis invicta virus-3  
MW314636 Myrmica rubra picorna-like virus  
OL569508 Corparats virus-2

LRQYLEDHIV--CNAACED-----QRTALQKIRKV-----AITAFSFIYED 2250  
LPKGN-----PREFPIPGSRQV-DLSSAYAAITPP-----2378  
WYLLFPEDKAGTFRQSLLSQRVRFASV-----AGTLTTAQAM-----2846  
LKIIGKVPVAVF-----LNGRKKDSAEI-----2579  
YCALFV-----KN-----PQRRADLRADK-LQA-----F-----2525  
L-----2604  
VSKVDPTTKTLVVQKTLNLDNMKECDVPPHVLGQSLSDN-ILAGRDVELTIDHFDKEW 2353  
LQQIPITSSR-TETNTDSDQDGRITSNQ---PIPAIRKKIVLQGREKEINPP---2482  
CSQLSKLEN-----2316  
LVLFSSQDEI-VR-----QINDI-----2320  
VELYNSAR-----ISDP-----2216  
LEEYVQIK-----LQKQ-----2689

DQ286292 Rosy apple aphid virus  
OP265432 Penaeus vannamei solinivirus  
MZ210029 Fushun monoleptalauta Solinvi-like virus 1  
KX024775 Nylanderia fulva virus 1  
KY070327 Diabrotica virgifera virgifera virus 2  
OQ540582 Apis mellifera solinivirus-1  
MN918666 Picornavirales [unknown host]  
MW251313 Icha Creek insect virus  
MZ822083 Apis picorna-like virus-4  
FJ528584 Solenopsis invicta virus-3  
MW314636 Myrmica rubra picorna-like virus  
OL569508 Corparats virus-2

HINAAIRNAGGKKYIIVIGKR-LADDTVEQVDGFYK-----FHRNGNCYFLSSII 2299  
-----EQETR-----ITSRVSKG-GCLPLP 2397  
-----TFDERH-----ESLIEQFWYLVPL- 2865  
-----TGVNQSDL-----N-----VCRFCGNY- 2596  
-----RRITYE-----NTLDKHGDKKVVAML 2545  
-----IKMGYL-----2610  
ERNNAISLNINGEYEAKESTIKEQKTVYELLDIAYSAIRSDVQEYVDSLSSLGYYIVDI- 2412  
-----RSTLSGSSYDNF-----YN-PSS 2499  
-----ERSR-----FI-----2322  
-----QSDCK-----FC-----2327  
-----NTSVR-----F-----2222  
-----SY-----2691

DQ286292 Rosy apple aphid virus  
OP265432 Penaeus vannamei solinivirus  
MZ210029 Fushun monoleptalauta Solinvi-like virus 1  
KX024775 Nylanderia fulva virus 1  
KY070327 Diabrotica virgifera virgifera virus 2  
OQ540582 Apis mellifera solinivirus-1  
MN918666 Picornavirales [unknown host]  
MW251313 Icha Creek insect virus  
MZ822083 Apis picorna-like virus-4  
FJ528584 Solenopsis invicta virus-3  
MW314636 Myrmica rubra picorna-like virus  
OL569508 Corparats virus-2

EKL-----GRKTAQ-----2309  
GSSTRGS-----DS--ARSNMPASSPRSA 2419  
-----IYL-----LYLVIRKTIKYVSINGNEIK--YDQELP-VHYMSQ 2900  
-----YDESRYTPQGCPCNKENRPNADYWEDL--TIPIRGGERPMTFRE-----2638  
DKCVATSPAIPTTCSCK-----CNRID--ER-----2569  
-----K-----2611  
GK-PQHYPPLPQVKSIVLDLLVDQKISYFDITHYSEYIEIAGNEKKTYRQAI-ILPREE 2470  
SRSDVHYPTVITP-----SI--ERS-----VRSN 2521  
-KQ-----2324  
-KKMIRY-----2333  
-M-----2223  
-----2691

DQ286292 Rosy apple aphid virus  
OP265432 Penaeus vannamei solinivirus  
MZ210029 Fushun monoleptalauta Solinvi-like virus 1  
KX024775 Nylanderia fulva virus 1  
KY070327 Diabrotica virgifera virgifera virus 2  
OQ540582 Apis mellifera solinivirus-1  
MN918666 Picornavirales [unknown host]  
MW251313 Icha Creek insect virus  
MZ822083 Apis picorna-like virus-4  
FJ528584 Solenopsis invicta virus-3  
MW314636 Myrmica rubra picorna-like virus  
OL569508 Corparats virus-2

-----CYSYYPGVSFDSSTNEVTL-----DVHASTSNYSLR--EDFEKDYDTD 2350  
PLN-SKQRRRLKRRRAERAAEAENATK-----QSSAELDPAPRRFTPSPAE-RQR 2467  
-----KEFNRLRRSHYLRKQLAQIAKQQHNRQSDLRKQAGDMNV- 2943  
-----IDFPRLAME--IDYV--PTKLTREEMYEIEDLLDSVAGENQND 2678  
-----TPTRNSKFRVKSKMALN-----NFRQEMNVT- 2595  
-----QQKKMAPQ--MRANLN-----HFVQEMNVA- 2634  
VFSTLLDRITIAQIRAPPLDLD-----QMTQEMNV- 2500  
-----D--FQRLDFNAVEQE-----RALRERNQSKRRRIDLDGRYQKE 2557  
-----SMFME-----P--QMNVS- 2336  
-----KRLLSGVSIQ-----R--QMNVS- 2349  
-----RQMLLKTFE-----R--QMNVS- 2239  
-----RTLFPRLGLK-----L--ESNIS- 2707

DQ286292 Rosy apple aphid virus  
OP265432 Penaeus vannamei solinivirus  
MZ210029 Fushun monoleptalauta Solinvi-like virus 1  
KX024775 Nylanderia fulva virus 1  
KY070327 Diabrotica virgifera virgifera virus 2  
OQ540582 Apis mellifera solinivirus-1  
MN918666 Picornavirales [unknown host]  
MW251313 Icha Creek insect virus  
MZ822083 Apis picorna-like virus-4  
FJ528584 Solenopsis invicta virus-3  
MW314636 Myrmica rubra picorna-like virus  
OL569508 Corparats virus-2

DHLIIANSADKPT-----L-GVMANDDPVTPMPTSVMD- -DK 2386  
---LMKRTGALPTAWDKLRVTPLPESPAEKQSLGAPSADAVPQMESGAPAGNGPAPAV 2524  
-----GLQLAT-----PAPSGVDVNTTGTSTIFTNRMIGNT 2974  
---IPLSTEGNVPT-----E-AQTEPTVTSGNMLWTNVGGKFG 2713  
-----PQSVGAIPQ-----APMTQTDVSVVTDGSLFTNTNAPS 2629  
-----PQVSNVVPK-----APFLASDVSVVGDAGLYTNTDAPAI 2668  
-----AGTVGKIPT-----APMTQTDVSVVADGSLYNTNTVAPSP 2534  
-----MMLTPHMGVTT-----GQISSLDPTVVPPQIQATNTTTFPS 2593  
-----ASLEHKTIG-----APMIAPDSVTTPDSGLVTNTMTSP 2370  
-----KITENHVP- -AGMMATDPSVAPDSGIATNTQTPSI 2383  
-----KGVHEAVPG-----ARMVSTDPSISPDGTGIAVNTVSP 2273  
-----AGVEHATPG-----APMISADPSIAPDTGIAVNTMTSP 2741

Jelly-roll fold  
capsid protein domain  
AmSV1: 2705-2864

DQ286292 Rosy apple aphid virus  
OP265432 Penaeus vannamei solinivirus  
MZ210029 Fushun monoleptalauta Solinvi-like virus 1  
KX024775 Nylanderia fulva virus 1  
KY070327 Diabrotica virgifera virgifera virus 2  
OQ540582 Apis mellifera solinivirus-1  
MN918666 Picornavirales [unknown host]  
MW251313 Icha Creek insect virus  
MZ822083 Apis picorna-like virus-4  
FJ528584 Solenopsis invicta virus-3  
MW314636 Myrmica rubra picorna-like virus  
OL569508 Corparats virus-2

ALYQPIIMNRSAPNNSWLRAGGITFNIYDLVYNQFVGC-NKQITVGDGTAAGTILAQIPY 2445  
GPVHPSSLQGMIT-----LAG--TAQNLNLSAMEFV--MGTPLOIDPSIAAAWTVKEISL 2576  
RLT-----LNNNTTSVINNPAGAGAPYDYLTKIHGIYS--LHLSGTLSSTTASGAEEVFRVSL 3028  
YMM-----TNSSESLINPRGTGAPFNLYRSLFEIYR--FEIRTTINGSIARGSLLAIVSL 2767  
AKI-----INSVGIALDNPAAGSAPFNKHVSVMYNIYQRWEAKNTVLSPALPSGTIVIRISL 2685  
AQD-----VNHTAIALDNPAAGTGAAFSKHQSCYQIYQNWDEKNTTVNPSMANGTEIMRLTL 2724  
ARV-----MNSLGIALDNPAAGTGAFFNKHVAVYNIYQRWESKNTSISPSMSQGTETVIRISL 2590  
VPD-----FNPGAVALNNPAGTGAPFDKKEVYNIYQEWESKNTSVNGTVPRGAIVCRISL 2649  
CRV-----INPGATSLDNPAAGTGAAFDKRDSIYGIYQRWEKSAIVNYSGLQEGAEVVIRISL 2426  
SRV-----LNPIARALDNPAAGTGAPFDKHTYVYVNFTRWPEMSTVVNKSIAAGAEVFKISL 2439  
VRV-----INPGATSLDNPAAGSAAFDKRDSIYRVYRWSEKNTSINGSLTQGAEEVIRISL 2329  
ARV-----INPLAQALDNPAAGTGAAFDKKDAIYGIYRWTERQGTINGSLNQGAEEVFRISL 2797



DQ286292 Rosy apple aphid virus  
OP265432 Penaeus vannamei solinivirus  
MZ210029 Fushun monoleptalauta Solinvi-like virus 1  
KX024775 Nylanderia fulva virus 1  
KY070327 Diabrotica virgifera virgifera virus 2  
OQ540582 Apis mellifera solinivirus-1  
MN918666 Picornavirales [unknown host]  
MW251313 Icha Creek insect virus  
MZ822083 Apis picorna-like virus-4  
FJ528584 Solenopsis invicta virus-3  
MW314636 Myrmica rubra picorna-like virus  
OL569508 Corparats virus-2

DQ286292 Rosy apple aphid virus  
OP265432 Penaeus vannamei solinivirus  
MZ210029 Fushun monoleptalauta Solinvi-like virus 1  
KX024775 Nylanderia fulva virus 1  
KY070327 Diabrotica virgifera virgifera virus 2  
OQ540582 Apis mellifera solinivirus-1  
MN918666 Picornavirales [unknown host]  
MW251313 Icha Creek insect virus  
MZ822083 Apis picorna-like virus-4  
FJ528584 Solenopsis invicta virus-3  
MW314636 Myrmica rubra picorna-like virus  
OL569508 Corparats virus-2

DQ286292 Rosy apple aphid virus  
OP265432 Penaeus vannamei solinivirus  
MZ210029 Fushun monoleptalauta Solinvi-like virus 1  
KX024775 Nylanderia fulva virus 1  
KY070327 Diabrotica virgifera virgifera virus 2  
OQ540582 Apis mellifera solinivirus-1  
MN918666 Picornavirales [unknown host]  
MW251313 Icha Creek insect virus  
MZ822083 Apis picorna-like virus-4  
FJ528584 Solenopsis invicta virus-3  
MW314636 Myrmica rubra picorna-like virus  
OL569508 Corparats virus-2

DQ286292 Rosy apple aphid virus  
OP265432 Penaeus vannamei solinivirus  
MZ210029 Fushun monoleptalauta Solinvi-like virus 1  
KX024775 Nylanderia fulva virus 1  
KY070327 Diabrotica virgifera virgifera virus 2  
OQ540582 Apis mellifera solinivirus-1  
MN918666 Picornavirales [unknown host]  
MW251313 Icha Creek insect virus  
MZ822083 Apis picorna-like virus-4  
FJ528584 Solenopsis invicta virus-3  
MW314636 Myrmica rubra picorna-like virus  
OL569508 Corparats virus-2

DQ286292 Rosy apple aphid virus  
OP265432 Penaeus vannamei solinivirus  
MZ210029 Fushun monoleptalauta Solinvi-like virus 1  
KX024775 Nylanderia fulva virus 1  
KY070327 Diabrotica virgifera virgifera virus 2  
OQ540582 Apis mellifera solinivirus-1  
MN918666 Picornavirales [unknown host]  
MW251313 Icha Creek insect virus  
MZ822083 Apis picorna-like virus-4  
FJ528584 Solenopsis invicta virus-3  
MW314636 Myrmica rubra picorna-like virus  
OL569508 Corparats virus-2

DQ286292 Rosy apple aphid virus  
OP265432 Penaeus vannamei solinivirus  
MZ210029 Fushun monoleptalauta Solinvi-like virus 1  
KX024775 Nylanderia fulva virus 1  
KY070327 Diabrotica virgifera virgifera virus 2  
OQ540582 Apis mellifera solinivirus-1  
MN918666 Picornavirales [unknown host]  
MW251313 Icha Creek insect virus  
MZ822083 Apis picorna-like virus-4  
FJ528584 Solenopsis invicta virus-3  
MW314636 Myrmica rubra picorna-like virus  
OL569508 Corparats virus-2

DPVDNPFANGYIQLVLLHGRMTGDWMIKTCPGNPGMQCSIGVGWSPSK-IAETVPM 2504  
HESKWQN--PVARLFYQLHKNRSPALDIKVEVTGAVFVDGKLATCIVYGGPANGKYS 2634  
DPATWPE--E-LQTYVNMHESICPDIDISVMINGAAGALGTMKIGWVPDA-DAMNKYSLA 3084  
NPANYEP--Y-QALWAKLHRYFSPQRCLVNLAGAAGSIGVWTFSWHPDE---EDLRF 2820  
DPKELPQ--M-IRSYIDFHESEFIPALDIVIAAGAGTIGWIAATGWVKDA-SSTKRYTLQ 2741  
DPKTPWK--R-IVDYIMFHDILPALDIVIAGAGTIGWIKSGWVKDA-SSTKRYTSG 2780  
DPRDLDP--M-IQSYMQFHDSEFIPALDIVIAGAGTIGWIAATGWVKDA-SPEKKYSL 2646  
DPQYYPR--K-ILEYILFHQQIIEIEVGLAIGGAAGTISWLRIGWVQDA-A-KEKITID 2704  
DPKTLPA--R-IREYVNFHEYIIPALDIVIAGAGTIGWIKSGWVPDD---TLKYGLD 2480  
DPNKLKP--R-ILQYIFHKTIIPQIEVQILIGGAAGTIGWIKSGWVPDA-STAKRYSLD 2495  
DPRSLPK--R-IREYIDFHNALIPQIDVQILIGGAAGTIGWIKSGWVPDD---AMKVTL 2383  
NPQTLPQ--R-IREYIAFHQSLIPQIDVQILIGGAAGTIGWIKSGWVPDD---SKTYTLD 2851

VITKYAFFTTGVSSEWSHTIVMTDARQNNFYRTIQFNSKKEVEDVANMPHIVIFCETPP 2564  
ELQOHYLTATYATNENNTVVTTLTDRRTSHFARTD-E---YDREPESQYKLLVVFVAVPI 2689  
DLQSIASDTVTNFQTSVFEGISDLRRANQYRKT-----VGDEPFPPGVALISLFPV 3136  
DIDEVTSWTTNLNNHQCMEFILLDDARIQQMRPTAN---PTMNGTEKFFCIAMVQDEPA 2876  
DLQGVAMEENMNGTQIKIKILTDDRVRMGLYRRV-----TDDEPFPPGIIMVDAV 2793  
DLQQIESKVVNMNGTQVFMKFLINDVRRSGLYRLI-----ENDPEYPGIVFVIESAV 2832  
DLQQVSLLEANMNGTQVIRVLLNDIRRGGLYRKM-----LQDPEFPYGIIMMIDHAV 2698  
EIQQISMQQINMNGTMTTFFLRDAMRRSFWRV-----KNDPDPYPGIVIMVAPHA 2756  
DLQAVACETVNMNGTITMCTLLTDNRQYGMRYKV-----QNDSEFPWALIMVDHPA 2532  
DLQVASETINLNTITMSMIINDSRNGMFRIT-----KSDPEFPWPGIVCLVEHPI 2547  
DLQLVAEEVNLNLTITMCTMLNDNRSGLYRLV-----KSDPEFPWALVMDHPA 2435  
DLQLVAEEVNLNLTITMCTMLNDNRSGMYRVV-----DNDPEFPWALIMIDHPA 2903

TSVYTEKSTYTLFFSKLCSSEDLMFNPSIKPFVLA---DPQQSVTYD-----SK 2611  
YNTSGADTPRIRIRVGDRLHPSSIFTMPNLPLVRSIT-----SSGTGMH 2733  
GNVGKTGTIEFGQVYMKLGANCFFMNPKSVTITK-----VN 3173  
TNVQRNDVSYPIQIRTKLGNPAVFVTPSRAGIEGG-----SGGGGVF 2919  
TNVQRNDVSYPIQIRTKLGNPAVFVTPSRAGIEGG-----AT 2831  
TNVQRNDVSYPIQIRTKLGNPAVFVTPSRAGIEGG-----SV 2870  
TNVQRNDVSYPIQIRTKLGNPAVFVTPSRAGIEGG-----PT 2736  
TNVQRNDVSYPIQIRTKLGNPAVFVTPSRAGIEGG-----DS 2794  
LNVQRNDVSYPIQIRTKLGNPAVFVTPSRAGIEGG-----EVG 2571  
TNVQRNDVSYPIQIRTKLGNPAVFVTPSRAGIEGG-----DGT 2474  
LNVQRNDVSYPIQIRTKLGNPAVFVTPSRAGIEGG-----SSG 2942

KGY-----SLNFLAPQL---STR---L-----RGAS-----LGNIFGLAY 2641  
TTIPHA---YH-HLKIVIDGAYYISSNER--RHLGPDINGYL---TGPCVPVDE 2779  
EKINLDHEITDEIDFLVGSAGIATATD-----QTYDTGVTA---KNAIPGS 3220  
NSISLSNYIPT-NFDTVMVGDAGVQAYS---VVSLED-RGLTGNFDFNSDEGNVYVGR 2974  
TSFDLGSYFYDTHVDALIGSSAVADDPE--VVVHFD-SGPNVVDKFSVFGHNCVAAIY- 2887  
IDFFIGSYFYDDAVDMLVGSVVPNKQPT--ENDIDD-QGWLKGDFQPTFGANVIGMSW 2927  
QSFNLGSYFYDDVDALVASSALTSSPTA--TTTFPD-CGYLHDKFQPEYLQSNITYVAY 2793  
TAIDLEPLLGGVKPDLVETVQAQPV-LV---KTVEFFD-CGFTGTGTFQIPRTANIHAMNA 2850  
DLKSLKFFLNASTVDLIGSSKILNEGIS--LLEYFE-CGWLSDGNPPTDTDNHCNHL 2628  
DELDLSKYPNQLIDLLICNSYVFNVSVDLSTYFN-LNFS-----IHNTIDVVV 2657  
TRIALSGILQGGSIDLLIGTPNPNCRPTS--TKAYFD-CGMYTQGQFQEFTRDNLCSVGM 2531  
TIIDLNRYLKLSFDLLIGTSSICDNVQV--PHSFPD-CGLTGDGFKPKFSKENWCGTFQ 2999

TDYIY-----VHIEGDK-----LT-----D--- 2656  
RPHAG-----YVVDGSLADE-ISNLKQED--FTWYQDPDSNKNVLTYSYTHPK 3268  
FNAEGAYRFKAVHYGSEPTFTWKPVVDVKIVPETARFDREE-----HGLSVSQ 3025  
KQLDGATKAVPTI-SNDTPPSA--D---YLKEIED--MDKFE-----GGPNAQ 2927  
NEDMLDAPNKKLV-IVTELPELTPE--IITDFGA-FKEMD-----DDLTTQI 2970  
NALAKGKTATQLF-TTETTPGAT---LLAQIDS--LTFTF-----SASDQLS 2834  
LECHF-----T-----SNVLE--NVTQENV---DSAP-----EGSLKGF 2879  
RRTNY-----I-VPTDN-LSKI-----TLGKTIA-----QYSTQKF 2657  
SKRPY-----T-LALFE--TESQINSASVWRGLDT-----QLSVFIQ 2691  
SWTSG-----V-IVT-R-EAAYE--V-K-YPLTIKG-----TGTGERY 2562  
QAGTV-----I-YTTLS-QSAFQ--T-QVDSGIIKD-FD-----YASVSSI 3035

--LIFQNALTNIPDFTTIS-LF-QHEISSTETNYTFQFCVGYA-----SYY----- 2699  
--THFYFFYGAMTDE-ASAIYQDELSVYDASDDIMSFEEAETG----- 2837  
AIRSYLLYAFGVIPDMLPA---NQVIDLQGLCNIAIDLGFS-----QPITQCVL 3317  
SPISHYIAYGEVPTIYDGGV--EDPFSIMPGTIYIPPTDVTFSKGGRSIFGRIMRVMT 3083  
LPPNKLIFSFGTEAPLE--DFHYVNAEPTLLGSTYALSG-AVRVG-IFK---YNITSLVA 2980  
LPPNKLIFSFGTEAPLE--FMDYNGKDMPGATVYKTF-SVEIG-NLK---YGNSTTFI 3023  
LPPNKLIFSFGTEAPLE--HVVYEEETPTIQTGTVYIISD-TTRLG-LGF---YNCRTLLA 2887  
QHVWQIIFSFGTEAPLE--QVFNHLSHDNANLIPASQATEFVSIDITMG-SII---YQNTQLWV 2935  
YKFPSSIDFAYGQIPSVFERMTIYPAKF-GSFSNYTIQPLFTING-VFI---YKCTTMV 2712  
EKFPTVREAYNKVTTVHDDK---TPNFDGTVYKPVVDVKEHAYG-T---YELTMMWL 2742  
YRPSYFVAYGEVDASICEYTYRGEDPPPTGTYYTIPKFTIKFG-SMR---LSCQVNA 2618  
TIPGGIVFGYNGIPEAYTGMSTRVSDALQFNSTKYTIKRYTFRSSGLE---YACSQIEM 3092



DQ286292 Rosy apple aphid virus  
 OP265432 Penaeus vannamei solinivirus  
 MZ210029 Fushun monoleptalauta Solinvi-like virus 1  
 KX024775 Nylanderia fulva virus 1  
 KY070327 Diabrotica virgifera virgifera virus 2  
 OQ540582 Apis mellifera solinivirus-1  
 MN918666 Picornavirales [unknown host]  
 MW251313 Icha Creek insect virus  
 MZ822083 Apis picorna-like virus-4  
 FJ528584 Solenopsis invicta virus-3  
 MW314636 Myrmica rubra picorna-like virus  
 OL569508 Corparats virus-2

QFNGYFVVQSNSSGNFLPLIKD-----YTSSS-----E-YADIRRTI----- 2735  
 -----DILDV----- 2842  
 YEHGYILLQPVGTPTITTSGLNVRVVDYEKDPYIYGWVANITNVSQTTVCGYKENACCLP 3377  
 FEKGLIAETKIGNLAGINDI-----TWVVASQ-----KTG 3114  
 QANGCYIVMEIDSSVVVSTKHGK-----LVVYNSCNTNTNFDDQ--TD----- 3020  
 YFEGCVIMLEARYALHRTIENIPDC-----IAVVYLDSSVKKNTFFFYQDTQQTIN 3074  
 QASGCIIVAEIDHSVIEQSG-----KRYISYNKMNT-----DVV- 2921  
 YPNGISLKFNSLPKDFANGIRGIPSV-----RFSD-LNIG-----AWP 2972  
 FESGCIHFSIDGNYWEIT-VS-----GSEITTIQ-----AYE 2745  
 TSYGLVMEWSLDES RVFYGTYKTD-----NGRRNLIDG-----NTP 2779  
 FENGIVMVFRCNDVQRIHCQIES-----NGDITMLGD-----AQD 2653  
 FESGCIIMYFLLDNVVYINISYNNNT-----QFTL-TSKGDRNSFGQ-----TIN 3136

DQ286292 Rosy apple aphid virus  
 OP265432 Penaeus vannamei solinivirus  
 MZ210029 Fushun monoleptalauta Solinvi-like virus 1  
 KX024775 Nylanderia fulva virus 1  
 KY070327 Diabrotica virgifera virgifera virus 2  
 OQ540582 Apis mellifera solinivirus-1  
 MN918666 Picornavirales [unknown host]  
 MW251313 Icha Creek insect virus  
 MZ822083 Apis picorna-like virus-4  
 FJ528584 Solenopsis invicta virus-3  
 MW314636 Myrmica rubra picorna-like virus  
 OL569508 Corparats virus-2

-----YDWNPNPYVEDDYCTFLKVNQVNMFKIEKPVSCVAH-TTFSG-----SK-- 2778  
 -----BQFNGVIKYGTYADTRPCY 2861  
 -----YG-----FELS-----ELPVQLASNEFLNNFDA----- 3400  
 SVIYYLWDG-----VVNG-----ANPV-----SDLFGLSGGP-----SSL 3145  
 I-----DH-----AIVYDTR----- 3030  
 ISTTYYNWRQTHH-----LFPDPIG----- 3095  
 -----TQSDLD-----SFGPDVG----- 2934  
 PD-SYYWGTYNMLVAK-----TTDANVVYNKTPLDFFSLNV-FKGGFIYSTY--FGGK 2794  
 IARSDHCFIVS-SPD-----LLSDDKAYYNNPIGAKGGKLVDAQIYRIFKTESGGY 2831  
 IT--DYVFLYT-VDKA-----E-----QFVNPLDFTSA----- 2678  
 VA-----FLQNYMDPG-----KLPISMIDLSTPIGF----- 3162

DQ286292 Rosy apple aphid virus  
 OP265432 Penaeus vannamei solinivirus  
 MZ210029 Fushun monoleptalauta Solinvi-like virus 1  
 KX024775 Nylanderia fulva virus 1  
 KY070327 Diabrotica virgifera virgifera virus 2  
 OQ540582 Apis mellifera solinivirus-1  
 MN918666 Picornavirales [unknown host]  
 MW251313 Icha Creek insect virus  
 MZ822083 Apis picorna-like virus-4  
 FJ528584 Solenopsis invicta virus-3  
 MW314636 Myrmica rubra picorna-like virus  
 OL569508 Corparats virus-2

-----SEWVFVPSLEVIE--FIKDRVKFR-----ITKLL--LPDNNDRKMSFK 2818  
 WVRTRATFLAVQ-----PKNGQQYNT-----T-----VR 2886  
 -RKQNVQ-HNWLQ-----GTGYVENGFKYCSQSTDNSFQPVWP-NSSDTLEDIKIP 3449  
 AGNGNVVPTGWPVTGGVTGFQVGD-----FARW----- 3172  
 -KEVEVN-WIFQEFSSHKIASG-----NPFRRPVRIDQTESIYVT 3068  
 -KIGNLG-PDWKEL-----VD 3109  
 -QDTKVS-ILWRDPNHNRDVVG-----DDLVRHPIATT-THYVV 2971  
 WVPQNDIYICWTGSEWGRHVGGTSYVP-NN-----NTNGQFTTCTPTT----- 3018  
 WQALASY-----INLEPIDN-IDGF-----TPRKKWF-----LP 2823  
 RSDPFVPETWYP--SETPYNAD----- 2851  
 -----TPSYWWSITPTNTPISHNNQNLMPR-----TRPKDFYFAPVY----- 2715  
 -----QPLTCWEYRSSSQIFSITSSV--L-----TFSRRYYIAVARDDTR-ISFD 3204

DQ286292 Rosy apple aphid virus  
 OP265432 Penaeus vannamei solinivirus  
 MZ210029 Fushun monoleptalauta Solinvi-like virus 1  
 KX024775 Nylanderia fulva virus 1  
 KY070327 Diabrotica virgifera virgifera virus 2  
 OQ540582 Apis mellifera solinivirus-1  
 MN918666 Picornavirales [unknown host]  
 MW251313 Icha Creek insect virus  
 MZ822083 Apis picorna-like virus-4  
 FJ528584 Solenopsis invicta virus-3  
 MW314636 Myrmica rubra picorna-like virus  
 OL569508 Corparats virus-2

NLKSFDLNYPPINQIEKALNDVPLANLPQGIQVVFSSYPQ--LSVNNPFRGRQ-TPHI 2874  
 NI---TGM--SGLLPQM--SAKDPLTPTGESRCLFQQHSSSITSGNYAGENSPLFAGTL 2939  
 FK--VEDG--YFAPASVSSNGSTITSTGLTEFFFAKPGSLNKNNS-YIPL-ASGV 3503  
 SVTRQSRRI--LNLTFVLQGNNAATEVLPEGLRAFYFMRPGETSTNLTSGSGFFGLP-VNPA 3229  
 DT--QSDK--KPTVVYQGTGNSMPSTTLPTGLKQLSFVRSGTTTQVTEDELFVPLY-KPII 3123  
 DIKPTVKE--VTKTFLCTSNAPSTILPTGLKQISFVRKGTSTSDPHDNPSNVPE-KPIL 3166  
 NPSTIRSS--VLQTFVTGNSMPATNLPAGLKQLTFVRSGETSTSVSDLPFFVPLE-KPML 3028  
 --DMPVT--DIPNVYFTGNSFPFISLPDGLKAFYIARSGQTS--VDSPIVVA-ARGI 3070  
 DQKKTTLT--YDWTYVLTGSLPATLGNLKTAFMVRPGETSTTADDAAFAPIT-ARGI 2880  
 WSGVKMPY--QIRKVIQTGNLAGKHLGDGLKMCAMIRQSSSTQSTDNFYFYPIY-VHNF 2908  
 PGVNDNRF--FQPTYIQSGNNVPTTSLPAGIRFAAMCRPGTSSNISNESGFYPLL-APGI 2772  
 NAEQADRL--YVWSFIQTGNTAPATALPNQIKVCSLIREPGTTTQVTDNGFYPMI-VPLG 3261

DQ286292 Rosy apple aphid virus  
 OP265432 Penaeus vannamei solinivirus  
 MZ210029 Fushun monoleptalauta Solinvi-like virus 1  
 KX024775 Nylanderia fulva virus 1  
 KY070327 Diabrotica virgifera virgifera virus 2  
 OQ540582 Apis mellifera solinivirus-1  
 MN918666 Picornavirales [unknown host]  
 MW251313 Icha Creek insect virus  
 MZ822083 Apis picorna-like virus-4  
 FJ528584 Solenopsis invicta virus-3  
 MW314636 Myrmica rubra picorna-like virus  
 OL569508 Corparats virus-2

APIFLFISRLKQQYGSSETVE---IVFN-----SAFNGQ-QVI---VARIDLSTAVE--- 2918  
 DYTFAQEFGEDEDAVVAL-----TDNRTDSTVCYLWWSGTFFSWSIRATPYLAS--NF 2991  
 VTLKRLMNLANG--RIM-NFTIFIQDMPDFQVTLNG--ELI--LIKPEVCMARKGV 3554  
 WGLLDRLQDIADQLQTNLHFSWVGADGVEIGKLYSS--GFI--VCRCTSRLLIR-AG 3283  
 KNAFRAFDEYLVNNGFSNLVRGDLIYAGENKQIGYQN--STF--FVRTDDFKKIF-AN 3177  
 KGVILGLEQVQLQGLTNGL-VGNLEINGENIGQVGFAD--ETL--IVRTDDFKVVK-VN 3219  
 PNAIAALNKVLSDNGWKAL-KADLYVQNLNLGQVGYQD--GYF--FIKSDLYRQIL-PR 3081  
 NNVFDKLDRAQDYQVTLW-KMNLIVDDNIIGQLAYAN-RTF--ICRTNDVLRVR-AS 3123  
 HSLYKTLNDYLVTLNTELI-IADLVVAGNILGKVGKVF--NAF--LTRTSVGKVIK-TA 2933  
 SALLKQMNLLKERRTKYI-KFDLVQVGGKPFQMGFGD--GAF--IGRTTMRPQIR-AA 2961  
 AGVFGNLDLIAHSLKADII-QMDVLVDGRLFTKVAYAD--GTF--LVRTNVRRIR-TA 2825  
 EVVYTQLDQIMDNLGALL-QFSVLVQGGVIARLAYTQ--GAF--LGRSSIRLLIR-TA 3314

DQ286292 Rosy apple aphid virus  
 OP265432 Penaeus vannamei solinivirus  
 MZ210029 Fushun monoleptalauta Solinvi-like virus 1  
 KX024775 Nylanderia fulva virus 1  
 KY070327 Diabrotica virgifera virgifera virus 2  
 OQ540582 Apis mellifera solinivirus-1  
 MN918666 Picornavirales [unknown host]  
 MW251313 Icha Creek insect virus  
 MZ822083 Apis picorna-like virus-4  
 FJ528584 Solenopsis invicta virus-3  
 MW314636 Myrmica rubra picorna-like virus  
 OL569508 Corparats virus-2

-NTFMYIK--TED--DAPLYSTLRFPSSAMLELLSIQTVYNGTQ-----AF-SDASEF 2965  
 SLSNICYVSHITRE-FSGKLPTDLSNFSSRV-----ASQGTPTQ-----KIV-- 3031  
 RVSETYLSNFTFTSNIEITLQTFNTTQ-IPWT-----TIVATSQ-----SKTF-- 3595  
 WVPNSKFVDIEAATSFSALPSLPIASVSWK-----TNTQL-----GVTNRF 3325  
 IQGDIKKNLADLPQANAINAFNTTGMSTWI-----SSGKRTR-----R--RL 3218  
 VGTNVVLNRNIVGTIDLKGITQFNTKGFSSWV-----SQGLKKT-----KARRFNL 3264  
 ITTACILQNTQYLDNVQGLTTFNLSSFSWV-----SASKRL-----RHR--QL 3123  
 LTTAMSLTNIEPVDNNTITPMNTNTWSPFK-----QVPTTSLVLVPKAAIKRLPEE 3175  
 LTTDQMINITAASNTSAISVLNVGGFASWS-----GSNT-----YFVGKRVFSF 2977  
 ITNVILLKNIVGVDDLSGLQALPTS GFADWV-----VKAQ-----STNSKFLND 3005  
 LSTNIIIDNQIPDINILPVPVINGFEPWT-----TGAA-----SLSDPFMMN 2869  
 LTKDIRLTEIARLDNINVLPLLPQGFSSWN-----SSSSQ-----SFRSKVVD 3359

DQ286292 Rosy apple aphid virus  
OP265432 Penaeus vannamei solinivirus  
MZ210029 Fushun monoleptalauta Solinvi-like virus 1  
KX024775 Nylanderia fulva virus 1  
KY070327 Diabrotica virgifera virgifera virus 2  
OQ540582 Apis mellifera solinivirus-1  
MN918666 Picornavirales [unknown host]  
MW251313 Icha Creek insect virus  
MZ822083 Apis picorna-like virus-4  
FJ528584 Solenopsis invicta virus-3  
MW314636 Myrmica rubra picorna-like virus  
OL569508 Corparats virus-2

DS-----NVITANAGAAAFITGGGILLSGLG-----QGLGAYAGQKMQMMDKTLWS 3012  
-----RCRTDLTE--PPAERQGNLISTSMQIHAQQNMLTQQLQAWQNELNREYN 3082  
KS-----RKMKQSGAFWG--MAAGSMMSGLG-----GGMSAYFANQQDQQLREIMDT 3641  
FVRPQKPISGINQSA--ALAIGGILLSGLG-----SGLGAVYASKRQSKLNAENW-- 3373  
DL-----N-NFHQQ--SATVGGAVMTGLG-----NGFSAWGDQLFQ----- 3251  
NL-----C-QYES-----FAGIAASGIG-----ALMGSVGQNVNMQYNDKIMEQ 3303  
NL-----D-NYTRF--ASAIAGGATISGLG-----QGITAWSNQMFG----- 3156  
TFRRKIAIAIKYQRESAIVA-GLGGAMTGLD-----NYLSQQ-----FNFTQ 3216  
Q-----SAFMALGMAAQAGSNMMQAIG-----NGLMYNDYKSWQDARLDKQNAL 3021  
FYNDKISTIERQASLGIAAAIGAGQGLFGGLS-----AQWQWQQQADWSRQMQRERLDM 3058  
KF-----MRQSAALIGASAAGGLFSGLT-----SALQFGEYNQWRNNYLOKQIDA 2914  
LF-----QKQSGAFMAVGALGGLFNGLA-----NTMQFQBYNEWKDAYQKRLHDT 3404

DQ286292 Rosy apple aphid virus  
OP265432 Penaeus vannamei solinivirus  
MZ210029 Fushun monoleptalauta Solinvi-like virus 1  
KX024775 Nylanderia fulva virus 1  
KY070327 Diabrotica virgifera virgifera virus 2  
OQ540582 Apis mellifera solinivirus-1  
MN918666 Picornavirales [unknown host]  
MW251313 Icha Creek insect virus  
MZ822083 Apis picorna-like virus-4  
FJ528584 Solenopsis invicta virus-3  
MW314636 Myrmica rubra picorna-like virus  
OL569508 Corparats virus-2

YEQKQ-----KHDIDNQRYLQQSMFDWKSHMQQDFDYGNEQQRQIDWQRSSQ 3061  
-----NAQQD-----RQHSEFLQTRDQHFKA----- 3103  
NNKFK-----KQYLAQQDFDQQLAL-----QTQQQNFQR----- 3669  
-----HRLSDLQHSLLGINKSQELAKMDKQFQQ----- 3401  
-ERMQ-----NAVLANNRAIAGANNAALAEQKAAFER----- 3283  
QKLMQ-----SMQLSNQRTIAEANNSAIARQQKAFEN----- 3336  
EN-MM-----KQLMANQQALQGANNAAIAKRQQEAFDR----- 3188  
QKDLV-----NLQGDNQIRVLQARYAQKQDYQAYLNHL----- 3249  
RLQLMEMQNEAAQVQAMRNQNEIDK-----IQKQAEI----- 3054  
MEKLA-----NINNQARLNQLTQSGAQQRTITQQAAYQ----- 3091  
QKSLA-----MMNNQNQRDL-----SKQNFDDQ----- 2936  
LKQLE-----GIRGENQLNL-----SKQNFDDQ----- 3426

DQ286292 Rosy apple aphid virus  
OP265432 Penaeus vannamei solinivirus  
MZ210029 Fushun monoleptalauta Solinvi-like virus 1  
KX024775 Nylanderia fulva virus 1  
KY070327 Diabrotica virgifera virgifera virus 2  
OQ540582 Apis mellifera solinivirus-1  
MN918666 Picornavirales [unknown host]  
MW251313 Icha Creek insect virus  
MZ822083 Apis picorna-like virus-4  
FJ528584 Solenopsis invicta virus-3  
MW314636 Myrmica rubra picorna-like virus  
OL569508 Corparats virus-2

AALFSQQNLYQDTQNKFTKELVETNLDSDIRARNNAQQLSGYRTDATVSGLSNSGRG--G 3119  
-----QMRGLR-----LGNLDGRDIPAG 3121  
G--NIGLSNGGAVGMMMRGNTASAS 3692  
QLELIGKSSSYSAMSGNTYGPFG--E 3424  
NLELKGYNSSSSQYGLFGTTPK--R 3306  
-----SLILKGYSSASAQSGLGVAE----- 3356  
-----NLQITGYNSASSQFGLIGPRHE--N 3211  
-----LLTLRLGYSSPGAQMGNIIDSLQH--P 3272  
-----KQSLILGYSSGNSAQNGNLEGRSR--G 3077  
-----QMNALGAGSVSAQNGMYTPS----- 3111  
-----FMELLGRSSSSALSNGNVASS----- 2956  
-----FMQLLGFSNVSSQQGHNGQTQT--G 3449

DQ286292 Rosy apple aphid virus  
OP265432 Penaeus vannamei solinivirus  
MZ210029 Fushun monoleptalauta Solinvi-like virus 1  
KX024775 Nylanderia fulva virus 1  
KY070327 Diabrotica virgifera virgifera virus 2  
OQ540582 Apis mellifera solinivirus-1  
MN918666 Picornavirales [unknown host]  
MW251313 Icha Creek insect virus  
MZ822083 Apis picorna-like virus-4  
FJ528584 Solenopsis invicta virus-3  
MW314636 Myrmica rubra picorna-like virus  
OL569508 Corparats virus-2

LG-----HP-----DAPRG--ATLPPRSAS--TQTNSPK----- 3144  
TQLSVLPAYSEHDPFTSSAKPKE--GNPSPAKPKEGNHPLGT----- 3162  
VG-----PQQQFVQSGKLDYLAD--SGARAPRKPVTVNSQNTIGSTKIRVPELDTKDRQ 3742  
LE-----SGKNFSSSGLLSGTASSSRGGPLVDLTNNHTTQR-----VNDM 3465  
GG-----TAV-----APPPRLTISSSQVQTESQQ-----TP----- 3331  
-----PNKNFVYSHVYQPNQGP-----QPKEV 3378  
QM-----NTRP-----YQNMNNFVYSHVTPTSPVPA-----PTGP-- 3240  
ET-----PAVEK-----EINNSE--N-SIQLFNYF--R--FE----- 3297  
ES-----VQRPP-----ILGVEA--NGMIPRVPLQ-----S-----GKTKE 3106  
-----N-----YTFLPSYK-----S-----NTTNY 3126  
-----LPPPSYT-----T-----NSLPS 2969  
RN-----PND-----PLPDLPYQ-----S-----NLNY 3468

DQ286292 Rosy apple aphid virus  
OP265432 Penaeus vannamei solinivirus  
MZ210029 Fushun monoleptalauta Solinvi-like virus 1  
KX024775 Nylanderia fulva virus 1  
KY070327 Diabrotica virgifera virgifera virus 2  
OQ540582 Apis mellifera solinivirus-1  
MN918666 Picornavirales [unknown host]  
MW251313 Icha Creek insect virus  
MZ822083 Apis picorna-like virus-4  
FJ528584 Solenopsis invicta virus-3  
MW314636 Myrmica rubra picorna-like virus  
OL569508 Corparats virus-2

---VYTT-----RPTGYFTGP 3157  
FDDFSLSTY---ASESTPGDEVLSMSDPPIYSEQSQAIMQMGHKEGELGKQSQGITS- 3218  
LGDNMYYDDLHNL--NAD--ETP-----STLA-----GTQKGIY-- 3774  
LNDFV-GTT--NNNNGMVPG-----EII--AN-----KHFGNL-GSV-HSRHGSISGF 3506  
-----RS-----NLEPLQEN----- 3341  
LNDKVYRNIS-GEEVSASDD--EASPVLSEG----- 3406  
-----QIGNPDS-----RRSSLMSSD----- 3256  
FRKPLYAPFFKSAGI-QNPS-----KINPIPSQGENPVPKVNITTEAIEHTETKPRMSGP 3351  
LRLDAY-----EQQRTKFKVP 3121  
YNNSVYHT--DNNITNNPS--N-----TSLTNNINNFPNPELQQQPFEMPTP 3169  
K---YSD--NASN-----TENPAHIPP 2977  
P---YYGA--NNST----- 3477

DQ286292 Rosy apple aphid virus  
OP265432 Penaeus vannamei solinivirus  
MZ210029 Fushun monoleptalauta Solinvi-like virus 1  
KX024775 Nylanderia fulva virus 1  
KY070327 Diabrotica virgifera virgifera virus 2  
OQ540582 Apis mellifera solinivirus-1  
MN918666 Picornavirales [unknown host]  
MW251313 Icha Creek insect virus  
MZ822083 Apis picorna-like virus-4  
FJ528584 Solenopsis invicta virus-3  
MW314636 Myrmica rubra picorna-like virus  
OL569508 Corparats virus-2

MSSDNDKI----- 3165  
-----PIQPDYSDLA-----G 3229  
-LNLHNNLMADGIPGKSDEEKQALVK----- 3799  
SDTINDD-----PRFVKALE---QQNISKIAN 3530  
-----PGTETS-----EASLTP 3353  
-----DEQPIRYPAKEIKTATLLT--NHAPASLQP 3434  
-----SSDSL--PEIHVDVTHM-----TENPAHIPP 3280  
ESTLNPE-----AKEFTPKINS-----TLNPE-----AAEFK 3378  
KDSISNVKVDGATTDETDDVAIPPFLDRFRSVSTAYPEVADRARQSVV-----P 3171  
SEAYDNS-----KGFVPQPGTSKIATENINPNYKDEEHIYEPLEQQNHXYA 3216  
-----SSV-----SNASTTSYVQPPDIEAN-HYEQINYPEHIYE 3010  
-----YKLPFTDSSSSSSQSSIGTRYMTNS-NYS-----SIYN 3509

|          |                                            |                                                              |      |
|----------|--------------------------------------------|--------------------------------------------------------------|------|
| DQ286292 | Rosy apple aphid virus                     | -----                                                        | 3165 |
| OP265432 | Penaeus vannamei solinivirus               | GKRYPVLGSDPT-----PTNPSGTGL-KSAKAEFPPPAT-----                 | 3262 |
| MZ210029 | Fushun monoleptalauta Solinvi-like virus 1 | ---LSTQDIK-----RNTDP-----LLNKKKQGGTQPMDDKA                   | 3827 |
| KX024775 | Nylanderia fulva virus 1                   | PWNYDTRGPF-SDFEREIA--TGTRE-----VKASHLDWAREANRQGRQTLDPK       | 3576 |
| KY070327 | Diabrotica virgifera virgifera virus 2     | ASEYTTSPETKAEL-----TQRMKSGP-----ITKLSQSTPNWTPRALELGEASVNNNA  | 3401 |
| OQ540582 | Apis mellifera solinivirus-1               | SKGTVIPVKDLNDFAIQFNQTGNL-----FPKASQTFPNAGVTQ-----HA          | 3477 |
| MN918666 | Picornavirales [unknown host]              | PRNVVPYDDET-----PTGVDP-----IDP-----ALDKTD-----HA             | 3307 |
| MW251313 | Icha Creek insect virus                    | PSALMATD-----S-ALNLFGL-----                                  | 3394 |
| MZ822083 | Apis picorna-like virus-4                  | NLPMPSKD-----EPDDDENI-----                                   | 3187 |
| FJ528584 | Solenopsis invicta virus-3                 | DIDYNAMNISRENK---NSSNFGNVGILDHQYADIDYDAMKIIDQQNSSKFGNVGVNLH  | 3273 |
| MW314636 | Myrmica rubra picorna-like virus           | ELNYPTDS-----DKGYDK-IQNSYLNNPAPQKIY-----NS                   | 3041 |
| OL569508 | Corparats virus-2                          | GQNSSTRDSI-----ISGNSRNSS-TRNSFLDIPSVSNQI-----ST              | 3545 |
|          |                                            |                                                              |      |
| DQ286292 | Rosy apple aphid virus                     | -----                                                        | 3165 |
| OP265432 | Penaeus vannamei solinivirus               | -----LA-----                                                 | 3264 |
| MZ210029 | Fushun monoleptalauta Solinvi-like virus 1 | SGA-----                                                     | 3830 |
| KX024775 | Nylanderia fulva virus 1                   | LQAHHNQIKNNA-----GLLKATTPTTVE-----                           | 3601 |
| KY070327 | Diabrotica virgifera virgifera virus 2     | FNTQPSQDNAMQRTF-----GP-AV--AQ-----                           | 3422 |
| OQ540582 | Apis mellifera solinivirus-1               | ---DQ--RNMPETL-----LP-NDVLAQQ-----                           | 3494 |
| MN918666 | Picornavirales [unknown host]              | ---NFSSTIVHQL-----SP-NAYYNQ-----                             | 3325 |
| MW251313 | Icha Creek insect virus                    | -----                                                        | 3394 |
| MZ822083 | Apis picorna-like virus-4                  | -----                                                        | 3187 |
| FJ528584 | Solenopsis invicta virus-3                 | QYAEIDFSGNNTRKN---SQILDNSLYSKTQPSSKIMIDNSLYGINPNKMVENQNYEPAS | 3329 |
| MW314636 | Myrmica rubra picorna-like virus           | GKTDENILEKDSRSFANLLDDSPGNSVYDKTNPLV-----                     | 3076 |
| OL569508 | Corparats virus-2                          | QTNQPSITTENI---AVGTQDLP-----PKTRS-----                       | 3570 |
|          |                                            |                                                              |      |
| DQ286292 | Rosy apple aphid virus                     | -----                                                        | 3165 |
| OP265432 | Penaeus vannamei solinivirus               | -----GGTSGRIAARSATKTALKAVSKAHPALIAADVASQVVKANPTSL            | 3308 |
| MZ210029 | Fushun monoleptalauta Solinvi-like virus 1 | -----ASHIAPAIGQVN-----DEIMGGM--ADHAYNVLGL                    | 3859 |
| KX024775 | Nylanderia fulva virus 1                   | -----ETAHPDLVP-----ESEA-----                                 | 3614 |
| KY070327 | Diabrotica virgifera virgifera virus 2     | -----LAGAFKNINDTKEGV-----                                    | 3437 |
| OQ540582 | Apis mellifera solinivirus-1               | -----SQQAVNNIAQT-K-----                                      |      |
| 3506     |                                            |                                                              |      |
| MN918666 | Picornavirales [unknown host]              | -----                                                        | 3325 |
| MW251313 | Icha Creek insect virus                    | -----                                                        | 3394 |
| MZ822083 | Apis picorna-like virus-4                  | -----                                                        | 3187 |
| FJ528584 | Solenopsis invicta virus-3                 | MERKNSIFYSSNLRSSNNLKFNNIPNFKGPTN--LNISGAKPAGFGSGIIQP-----AI  | 3380 |
| MW314636 | Myrmica rubra picorna-like virus           | LG-----DNKPSGSKFNQLNSAMAAHPAGWGAVAGQLEKGFNTVA-               | 3117 |
| OL569508 | Corparats virus-2                          | IE-----DKMADAKGISNQFSNAIAAHPQGHGAVMAELKSKQMHGSL              | 3612 |
|          |                                            |                                                              |      |
| DQ286292 | Rosy apple aphid virus                     | -----                                                        | 3165 |
| OP265432 | Penaeus vannamei solinivirus               | GHLA---PV--QPMQPTVSLDGR-----                                 | 3326 |
| MZ210029 | Fushun monoleptalauta Solinvi-like virus 1 | SRYENDNSPTMSASPHPNIDFENTYSPADIHNYL                           | 3893 |
| KX024775 | Nylanderia fulva virus 1                   | -----                                                        | 3614 |
| KY070327 | Diabrotica virgifera virgifera virus 2     | -----                                                        | 3437 |
| OQ540582 | Apis mellifera solinivirus-1               | -----                                                        | 3506 |
| MN918666 | Picornavirales [unknown host]              | -----                                                        | 3325 |
| MW251313 | Icha Creek insect virus                    | -----                                                        | 3394 |
| MZ822083 | Apis picorna-like virus-4                  | -----                                                        | 3187 |
| FJ528584 | Solenopsis invicta virus-3                 | NKYTDFSKPN-----                                              | 3390 |
| MW314636 | Myrmica rubra picorna-like virus           | -----                                                        | 3117 |
| OL569508 | Corparats virus-2                          | NQEQQSSDLPPMLNSS-----                                        | 3627 |
